# A MOLECULAR PHYLOGENY OF PHYSIDAE (GASTROPODA: BASOMMATOPHORA) BASED ON MITOCHONDRIAL DNA SEQUENCES

AMY R. WETHINGTON<sup>1</sup> AND CHARLES LYDEARD<sup>2</sup>

<sup>1</sup>*Biodiversity and Systematics, Department of Biological Sciences, University of Alabama, Box 870345, Tuscaloosa, Alabama 35487, USA;*

<sup>2</sup>*Smithsonian Tropical Research Institute, 1100 Jefferson Drive, Suite 3123, MRC 705 Washington, DC 20013 USA*

(Received 14 August 2006; accepted 19 April 2007)

## ABSTRACT

The family Physidae (Pulmonata: Basommatophora) is a group of freshwater hermaphroditic snails that have a Holarctic distribution with extension into Central and South America. Despite considerable literature justifying various taxonomic schemes and groupings, no classification has been proposed using modern phylogenetic methods. In an effort to expand what is known concerning the evolutionary relationships of Physidae, we examined a portion of the mitochondrial 16S rRNA and cytochrome *c* oxidase subunit I genes among 66 specimens representing 28 taxa. The molecular phylogeny based on mitochondrial sequences supports the monophyly of the family Physidae. Six major clades were uncovered in the analysis, corresponding to differences in penial morphology. These six groups include the following recommended phylogenetic species and species groups: *Aplexa elongata* (Say), *Aplexa* 1 group; *Physa marmorata* Guilding, *Aplexa* 3 group; *P. fontinalis* (Linnaeus), *P. jennessi* Dall and *P. vernalis* Taylor & Jokinen, type a group; *P. gyrina* Say and *P. 'ancillaria'* Say, type b group; *P. acuta* Draparnaud, *P. spelunca* Turner & Clench, *P. species A* and *P. zionis* Pilsbry, type c group; and *P. pomilia* Conrad and *P. hendersoni* Clench, type bc group.

## INTRODUCTION

The freshwater family Physidae (Pulmonata: Basommatophora) has a Holarctic distribution, extending into Central and South America. Physids have been introduced around the world and figure prominently in aquatic ecosystems, particularly in lentic habitats. Physid diversity is centred in North America, where they are the most abundant and widespread freshwater gastropods (Burch, 1982). Physidae are hermaphrodites and can be distinguished from other pulmonates by the following characteristics: a high-spired sinistral shell, radula with teeth in V-shaped rows, simple jaw with no lateral processes, and lack of both haemoglobin and pseudobranchia. Other unique characteristics of many species of Physidae are an extended mantle edge that can partly cover the shell, as well as the presence of a preputial gland (Te, 1978).

Physid classification has been fluid and is still in a state of considerable flux (Taylor, 2003). Nineteenth-century workers (Walker, 1918) generally recognized two genera, the monotypic *Aplexa* Fleming, 1820 and the speciose *Physa* Draparnaud, 1805, which was divided into two 'sections': *Physa s.s.* (shell smooth) and *Costatella* Dall, 1870 (shell longitudinally costate). Baker (1928) placed all North American physids in the genus *Physella* Haldeman, 1843 separate from the European genus *Physa* based on anatomical differences in the mantle between European and North American species. *Physella* was further divided into two subgenera, *Physella s.s.* and *Physodon* Haldeman, based on penial morphology, and shell and columella characteristics (Baker, 1928). Thiele (1931–1935) and Zilch (1959–1960) recognized only the two older genera, *Aplexa* and *Physa*, with two subgenera under the former (*Aplexa s.s.* and *Stenophysa* Martens, 1898) and four subgenera under the latter (*Physa s.s.*,

*Alampetista* Zilch, *Costatella* and *Petrophysa* Pilsbry). Starobogatov (1967) created two new subfamilies, Aplexinae with three genera and Physinae with four.

One influential monograph of the Physidae was the doctoral dissertation of Te (1978) who examined 85 taxa of physids (78 of these were nominal species, the rest represented populations that Te felt were unique) using 71 morphological characters (37 shell and 34 anatomical characters). Although the dissertation was never published, a modified version of Te's (1978) classification was used in an influential guide to the North American freshwater snails (Burch & Tottenham, 1980; Burch, 1988). Te (1978) relied almost exclusively on the penial complex and associated characters to make his primary groupings: *Aplexa* group ('*Aplexa*-type' penial complex with six variations), *fontinalis* group ('*Physa* type-a' penial complex with no variation), *gyrina* group ('*Physa* type-b' penial complex with five variations), *acuta* group ('*Physa* type-c' penial complex with four variations) and *cubensis* group ('*Physa* type-bc' penial complex with three variations). Then considering both shell and anatomical characters, Te used both the 'simgra' technique (Estabrook, 1966) and the character compatibility method (Estabrook, 1972) to provide a phenetically based classification scheme for the family. He suggested two subfamilies, Aplexinae and Physinae, the former with genera *Aplexa* and *Stenophysa* and the latter with genera *Physa* and *Physella*. Te also noted that other ways to interpret his systematic results as a classification were to use *Stenophysa* as a separate genus of Physinae (instead of Aplexinae) or *Stenophysa* could be the sole genus of Stenophysinae. *Physella* was further divided by Te into three subgenera: *Physella*, *Petrophysa* and *Costatella*, with *Costatella* further divided into two sections: *Alampetista* having penial morphology c and *Costatella* having penial morphology bc. Te considered the monotypic subgenus *Petrophysa* to be the most differentiated physid, having both an unusual morphology and ecology. *Physella* (*Petrophysa*) *zionis* was initially grouped by Te with those having the *cubensis* bc penial complex.

Correspondence: A.R. Wethington; e-mail: [wethia@chowana.edu](mailto:wethia@chowana.edu)  
Biology Department, Chowan University, 1 University Place, Hassell Drive, Murfreesboro, New Carolina 27855, USA

**Table 1.** Penial group, the proposed new classification, Te's (1978) classification as adopted by Burch (1988), and Taylor's (2003) classification.

| Penial group     | Genus         | Species           | Te (1978)/Burch (1988) classification                   | Taylor (2003) classification             |
|------------------|---------------|-------------------|---------------------------------------------------------|------------------------------------------|
| Aplexa variety 1 | <i>Aplexa</i> | <i>elongata</i>   | <i>Aplexa elongata</i>                                  | Aplexini <i>Sibirenauta elongates</i>    |
| Aplexa variety 3 | <i>Physa</i>  | <i>marmorata</i>  | <i>Stenophysa marmorata</i>                             | Stenophysini <i>Stenophysa marmorata</i> |
| a                | <i>Physa</i>  | <i>fontinalis</i> | <i>Physa fontinalis</i>                                 | Physini <i>Physa fontinalis</i>          |
|                  | <i>Physa</i>  | <i>jennessi</i>   | <i>Physa jennessi</i>                                   | Physini <i>Beringophysa jennessi</i>     |
|                  | <i>Physa</i>  | <i>vernalis</i>   | not applicable                                          | Physini <i>Laurentiphysa vernalis</i>    |
| b                | <i>Physa</i>  | 'ancillaria'      | <i>Physella (Physella) ancillaria</i>                   | Physellini <i>Physella ancillaria</i>    |
|                  |               |                   | <i>Physella (Costatella) integra brevispira</i>         | Haitini <i>Haitia integra</i>            |
|                  |               |                   | <i>Physella (Physella) magnalacustris</i>               | Physellini <i>Physella vinosa</i>        |
|                  |               |                   | <i>Physella (Physella) parkeri</i>                      | Physellini <i>Archiphysa parkeri</i>     |
|                  | <i>Physa</i>  | <i>gyrina</i>     | <i>Physella (Physella) gyrina</i>                       | Physellini <i>Physella gyrina</i>        |
|                  |               |                   | <i>Physella (Physella) gyrina aurea</i>                 | Physellini <i>Physella gyrina</i>        |
|                  |               |                   | <i>Physella (Physella) gyrina microstoma</i>            | Physellini <i>Physella gyrina</i>        |
|                  |               |                   | <i>Physella (Costatella) johnsoni</i>                   | Physellini <i>Physella gyrina</i>        |
|                  |               |                   | <i>Physella (Physella) microstriata</i>                 | Physellini <i>Utahphysa microstriata</i> |
|                  |               |                   | <i>Physella (Physella) utahensis</i>                    | Physellini <i>Physella gyrina</i>        |
|                  |               |                   | <i>Physella (Physella) wrighti</i>                      | Physellini <i>Physella gyrina</i>        |
| bc               | <i>Physa</i>  | <i>hendersoni</i> | <i>Physella (Costatella) hendersoni</i>                 | Haitini <i>Haitia pomilia</i>            |
|                  | <i>Physa</i>  | <i>pomilia</i>    | <i>Physella (Costatella) heterostropha pomilia</i>      | Haitini <i>Haitia pomilia</i>            |
| c                | <i>Physa</i>  | <i>acuta</i>      | <i>Physella (Costatella) acuta</i>                      | Haitini <i>Haitia acuta</i>              |
|                  |               |                   | <i>Physella (Costatella) cubensis</i>                   | Haitini <i>Haitia cubensis</i>           |
|                  |               |                   | <i>Physella (Costatella) heterostropha</i>              | Haitini <i>Haitia acuta</i>              |
|                  |               |                   | <i>Physella (Costatella) heterostropha cupreonitens</i> | Haitini <i>Haitia mexicana</i>           |
|                  |               |                   | <i>Physella (Costatella) integra</i>                    | Haitini <i>Haitia integra</i>            |
|                  |               |                   | <i>(Physella (Costatella) integra billingsii)</i>       | <i>(Haitini Haitia integra)</i>          |
|                  |               |                   | <i>Physella (Costatella) integra niagarensis</i>        | Physinae <i>incertae sedis</i>           |
|                  |               |                   | <i>Physella (Costatella) virgata</i>                    | Haitini <i>Haitia mexicana</i>           |
|                  | <i>Physa</i>  | <i>spelunca</i>   | <i>Physella (Costatella) spelunca</i>                   | Haitini <i>Haitia spelunca</i>           |
|                  | <i>Physa</i>  | species A         | not applicable                                          | Not applicable                           |
|                  | <i>Physa</i>  | <i>zionis</i>     | <i>Physella (Petrophysa) zionis</i>                     | Physellini <i>Petrophysa zionis</i>      |

Taylor (2003) recently provided a new classification scheme of the Physidae. However, unlike Te (1978) who ultimately considered both shell and anatomical characters, Taylor's final classification was primarily based on the penial complex. Taylor (2003) assumed that changes in penial morphology were progressive, and classified the family into grades and clades based on whether groups possess primitive or specialized characteristics. Although a phylogeny was provided, this was really a dichotomous trellis diagram, not a cladogram. Following Starobogatov (1967) and Te (1978), Taylor treated Aplexinae and Physinae as subfamilies. The subfamilies were each divided into new tribes and the tribes into genera, many newly described (Taylor, 2003). Table 1 shows a comparison of Te's (1978) classification (as adopted by Burch, 1982, 1988; Burch & Tottenham, 1980) and Taylor's (2003) classification scheme for the individuals used in this study.

To investigate evolutionary relationships of the Physidae, we sequenced portions of two mitochondrial genes from 66 individuals of 28 taxa, representing six distinct morphological groups.

## MATERIAL AND METHODS

### *Collection, dissection and organization into penial morphology groups*

Physids were obtained from many geographic areas including 24 type or near type localities and placed directly in 95% ethanol (see Appendix for locality information). Representative individuals were dissected to ascertain their penial morphology. Using Te (1978) as an initial framework, the material was partitioned

into taxonomic groups based on presence or absence of a penial gland, the number and proportion of penial sheaths, and whether certain sections of the penial sheaths were glandular or nonglandular, as follows: subfamily Aplexinae: *Aplexa* variation 1 group (no preputial gland with a one-part glandular penial sheath, 1 individual); *Aplexa* variation 3 group (no preputial gland with a one-part nonglandular penial sheath, 2 individuals); subfamily Physinae: type a group (preputial gland present with a one-part glandular penial sheath, 5 individuals); type b group (preputial gland present with a two-part penial sheath having both glandular and nonglandular regions, 26 individuals); type bc group (preputial gland present with a one- to two-part penial sheath with both glandular – much smaller – and nonglandular regions, 7 individuals, including *Physa pomilia*); type c group (preputial gland present with a one-part nonglandular penial sheath, 25 individuals, including *P. cubensis* and *P. zionis*). Unlike Te (1978), we placed both *P. cubensis* and *P. zionis* in the type c group instead of the type bc penial morphology typical of other members of the group (e.g. *P. hendersoni*) based on the dissections. Similarly, based on dissections, we placed *P. pomilia* in the bc group instead of the type c group as originally designated by Te (1978). Figure 1 shows schematic diagrams of the penial morphology for each representative group.

Additionally, 10 specimens were included as representatives of other freshwater basommatophoran families (Ancyliidae, Lymnaeidae, Planorbidae; see Appendix). The marine putative basommatophoran *Siphonaria* sp. and two stylommatophorans (*Euhadra herklotsi* and *Albinaria coerulea*) were included as outgroup taxa (Hatzoglow, Rodakis & Lekanidou, 1995; Yamazaki *et al.*, 1997).

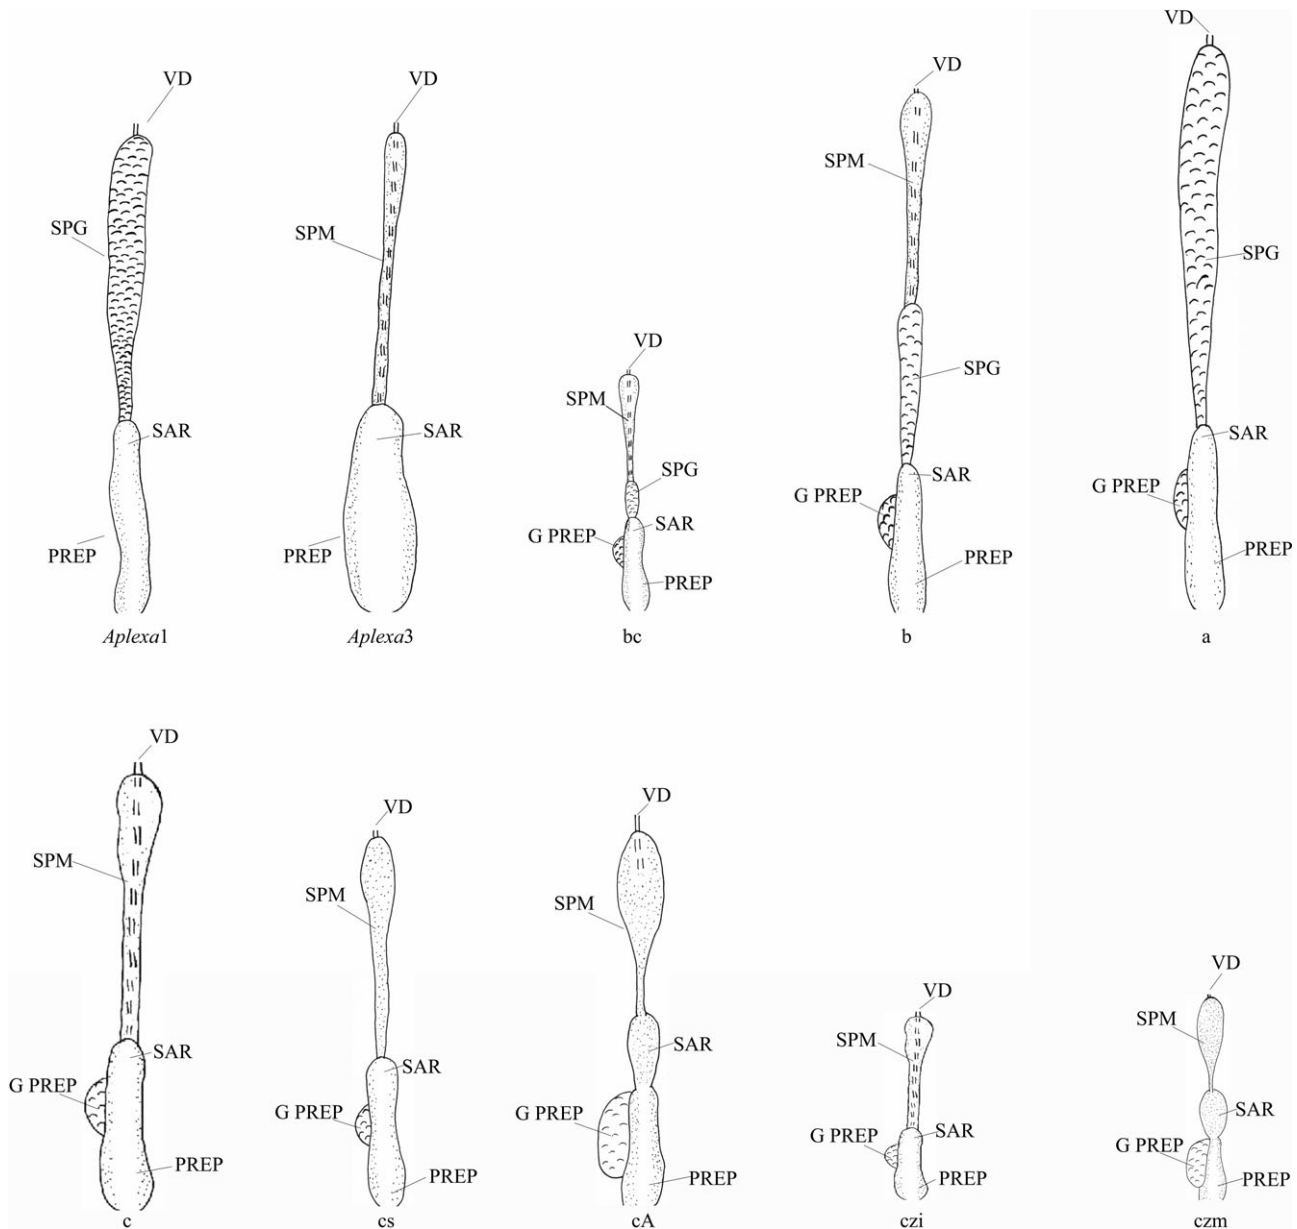

**Figure 1.** The six phylogenetic groups and their respective penial complexes. The genus *Aplexa* here represents *Aplexa* type 1 penial morphology. The genus *Physa* has five distinct penial morphologies: *Aplexa* 3, c, bc, b and a. The variation within type c is shown in the bottom row: c = typical penial c morphology, cs = penial morphology found in *Physa spelunca*, cA = penial morphology found in *Physa* species A, czi = penial morphology found in immature *Physa zionis* and czm = penial morphology found in mature *Physa zionis*. Abbreviations: PREP, preputium; G PREP, preputial gland; SPG, the glandular portion of penial sheath; SPM, muscular portion of the penial sheath; VD, vas deferens; and SAR, sarcobelum (underneath what is drawn). The penis is easily visible in the muscular portion of the penial sheath and becomes the vas deferens outside the penial sheath(s).

#### DNA extraction

Genomic DNA was isolated from head tissues or whole animals using standard phenol/chloroform methods. Mitochondrial DNA sequences were obtained for a 650 base-pair segment of the mitochondrial cytochrome *c* oxidase subunit I (COI, the primers used were LCO1490: 5'-ggtaacaacaatcataaagatattgg-3' and LCO2198: 5'-taaacttcagggtgaccaaataatca-3' from Folmer *et al.*, 1994) and a 550 base-pair segment of the mitochondrial 16S rRNA (the primers used were L2510: 5'-cgctgtttatcaaaaat-3' and H3080: 5'-acgtgatctgagttcagaccgg-3' from Palumbi *et al.*, 1991). Double-stranded amplifications via PCR were

generated using 50–500 ng of template genomic DNA in 25  $\mu$ l volumes (10 mM Tris, 50 mM KCl, 2.5 mM MgCl<sub>2</sub>, 1  $\mu$ M each primer, 0.1 mM each dNTP, 1.5 U Taq DNA polymerase; Fisher Scientific). The amplification regime began with a denaturation at 92°C for 2 min followed by 35 cycles of the following: denaturation at 92°C for 40 s, annealing at 52°C for 60 s (16S)/50°C for 60 s (COI), and extension at 68°C for 90 s. Double-stranded products were concentrated using Millipore Ultrafree MC filters and provided the template for cycle sequencing using the ABI BigDye kit following manufacturer's instructions. Reactions were purified using Quiagen DyeEx spin columns and sequenced on an ABI 3100 genetic analyser.

*Phylogenetic analysis*

Sequence data were aligned by eye for COI. For 16S, the sequence data were aligned initially using Clustal W (Thompson, Higgins & Gibson, 1994) and subsequently adjusted by eye using molluscan secondary structure models for 16S rRNA to identify conserved stems and loops (Lydeard *et al.*, 2000) in BioEdit (Hall, 1999). Since both 16S and COI are mitochondrial genes, sequence data from both were combined for three separate phylogenetic analyses (parsimony, likelihood and distance) using a putative basal basommatophoran (*Siphonaria* sp.) and two stylommatophorans (*Euhadra herklotsi* and *Albinaria coerulea*) to root the trees (Wade & Mordan, 2000). Two separate Bayesian analyses were performed on the COI and 16S data sets. Portions of the loop region were excised from the 16S data due to ambiguities of alignment. Also, one section (from 3 to 15 bp) of COI was excised where two taxa (*Gyraulus parvus* and *Siphonaria* sp.) have extra bases. This truncated data set consisted of 1,122 bases (463 of 16S and 659 of COI, including indels).

In preliminary parsimony runs, the heuristic search did not get past the first replicate before running out of memory. Consequently, the maximum number of trees retained in any one replicate of the analysis was set to 20,000 for each of the 100 random replicates. Otherwise, default settings were used. Of the 1,122 total sites in the combined analysis, 554 were potentially phylogenetically informative according to the parsimony criterion. Alignment gaps were treated as missing character states and only minimal-length trees were retained (one tree held at each step during stepwise addition). A bootstrap analysis was performed using 10,000 pseudoreplicates and these values were mapped onto the resulting strict consensus tree. We used version 4.0b10 of PAUP\* (Swofford, 2001) to perform the parsimony analysis.

An optimal model for sequence evolution was determined using Modeltest 3.0 (Posada & Crandall, 1998). The TVI + I+G model was selected as being the most appropriate model of nucleotide substitution with the assumed proportion of invariable sites being 0.1646 and the gamma distribution shape parameter being 0.5057. Using the optimal base-pair substitution model, a likelihood analysis was performed. A bootstrap was performed using 100 bootstrap replicates with the optimality criterion set to parsimony (addition sequence was simple, number of trees held at each step during stepwise addition was one, and the TBR branch-swapping algorithm was used). The maximum number of trees held at each bootstrap replicate was preset to 20,000, which was more than needed for most of the replicates performed. All characters were given equal weight and multistate taxa were interpreted as uncertain. We used version 4.0b10 of PAUP\* (Swofford, 2001) to perform the likelihood analysis.

Using the same optimal model for sequence evolution determined by Modeltest 3.0 (Posada & Crandall, 1998), the TVI + I+G model was used to estimate DNA distances, a neighbour-joining tree was constructed with 10,000 bootstrap pseudoreplicates using version 4.0b10 of PAUP\* (Swofford, 2001).

MrBayes v3.0B4 (Ronquist & Huelsenbeck, 2003) was used for the Bayesian analyses. The Bayesian inference was based on the posterior probabilities guided by the General Times Reversible model. The COI and 16S gene portions were analysed separately due to the limitations of computer memory. There were four separate Monte Carlo Markov chains and the number of generations was preset to 10,000,000 with the first 10,000 generations excluded from the analysis for both runs. The burnin value was sufficient for stable likelihood tree values for each analysis. Probabilities were calculated for each node.

Since COI is a coding region of the mtDNA genome, a coding block was used for COI Bayesian inference. The data were

partitioned by codon and the GTR (General Times Reversible) model was used for each defined partition within the 594-base-pair segment used.

A noncoding block was used for the 16S gene portion (528 base-pairs included). The GTR model was used to infer the Bayesian phylogeny.

## RESULTS

*Phylogenetic analyses*

Parsimony analysis of the 1,122 molecular characters resulted in 20,000 trees (set by the analysis) of tree length 3,417. The consistency index was 0.3705. The homoplasy index was 0.6295. The consistency index excluding uninformative characters was 0.3297. The homoplasy index excluding uninformative characters was 0.6703. The retention index was 0.7310. The rescaled consistency index was 0.2708. A strict consensus tree of all equally parsimonious trees is shown in Figure 2 along with bootstrap values. Both the Likelihood and Distance methods used the TVM + I+G model as selected by Modeltest (Posada & Crandall, 1998) and are shown in Figures 3 and 4, respectively. The separate COI and 16S Bayesian analyses are shown in Figure 5 (A and B, respectively).

The molecular phylogeny supports a monophyletic freshwater Basommatophora, Lymnaeidae and Physidae (all analyses). The ancylid *Laevapex fuscus* (labelled scAB1), nested within the Planorbidae (all analyses), which together are sister to the Physidae in all analyses except the likelihood and the COI Bayesian analysis where the Lymnaeidae were sister to the Physidae.

The putatively circumboreal *Aplexa elongata* (*Aplexa* variation 1) is the most basal member of the family Physidae, followed by an unresolved polytomy containing all Physinae taxa plus *Stenophysa marmorata* (*Aplexa* variation 3) of the subfamily Aplexinae, rendering each subfamily paraphyletic. The 16S Bayesian analyses place *S. marmorata* as the second most basal group of the family Physidae and potentially outside the rest of the Physinae, but still paraphyletic with regards to the *Aplexa* penial morph (variations 1 and 3). Within the 'Physinae' + *S. marmorata* clade are five major subclades: (1) *S. marmorata*, (2) penial morphology a complex, (3) penial morphology b complex, (4) penial morphology bc complex and (5) penial morphology c complex. The only exception is the COI Bayesian analysis which did not resolve the difference between penial morphology a and *Aplexa* penial variation 3.

Within the penial morphology a complex, all three included members form monophyletic groups: *Physa fontinalis*, *P. jennessi* and *P. vernalis*. *Physa fontinalis* and *P. jennessi* are more closely related to each other than either is to *P. vernalis*. In the Bayesian COI analysis, *P. vernalis* was sister to *S. marmorata*, rendering the penial morphology a group paraphyletic (Fig. 5A). In all other analyses, penial morphology a formed a monophyletic group nested within the Physinae (Figs 2–4 and 5B).

The nominally diverse *gyrina* complex is monophyletic (Figs 2–5) and includes two subclades in most phylogenetic analyses (the exception being the COI Bayesian analysis where the two subclades became paraphyletic, Fig. 5A), tentatively referred to as 'typical' species and 'globose' species. The members of the 'typical' clade, including *P. gyrina* from its type locality, are well suited to water temperatures that are either elevated by position in the water column (Clampitt, 1970), thermal springs (Clench, 1926; Wethington & Guralnick, 2004), or artificially from thermal effluent (Agersborg, 1929). The individuals included in the 'globose' clade are generally large as adults (between 10.6–25.6 mm) with globose shells (some with pronounced shoulders as is *Physa parkeri* Currier) and are found in much cooler water than those of the other clade. Within the 'typical' clade, *Physa gyrina*, *P. gyrina microstoma*

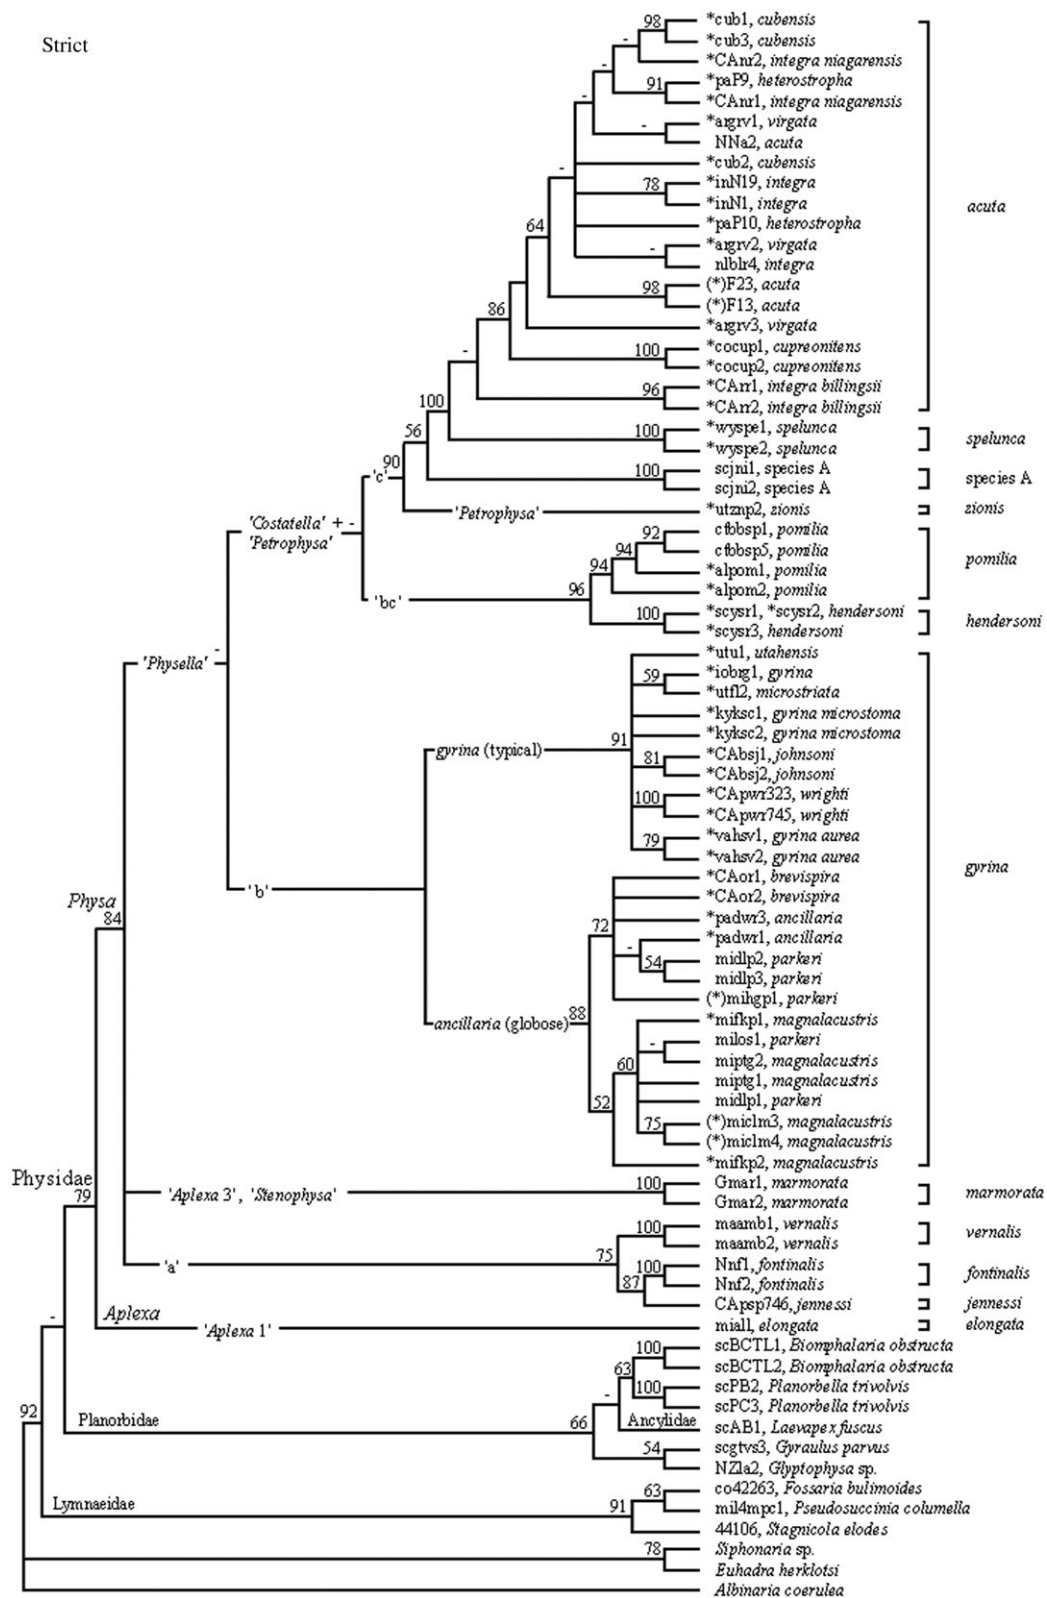

Downloaded from https://academic.oup.com/mollus/article/73/3/241/1111696 by guest on 23 April 2024

**Figure 2.** Strict consensus tree of all equally parsimonious trees (tree length = 3,417) for the Physidae sequence data. Bootstrap values are located above stems. Nodes are labelled by penial morphology and taxonomic category. The node labelled 'Costatella' + 'Petrophysa' is equivalent to Te's (1978) subgenera *Costatella* Dall + *Petrophysa* Pilsbry. The node labelled 'Physella' is equivalent to Baker's (1928) genus *Physella* Haldeman. Nodes labelled *gyrina* (typical) and *ancillaria* (globose) within the *gyrina* clade show separation between the two morphotypes despite the small genetic distance. Taxon labels with \* are from type localities and with (\*) are from near type localities.

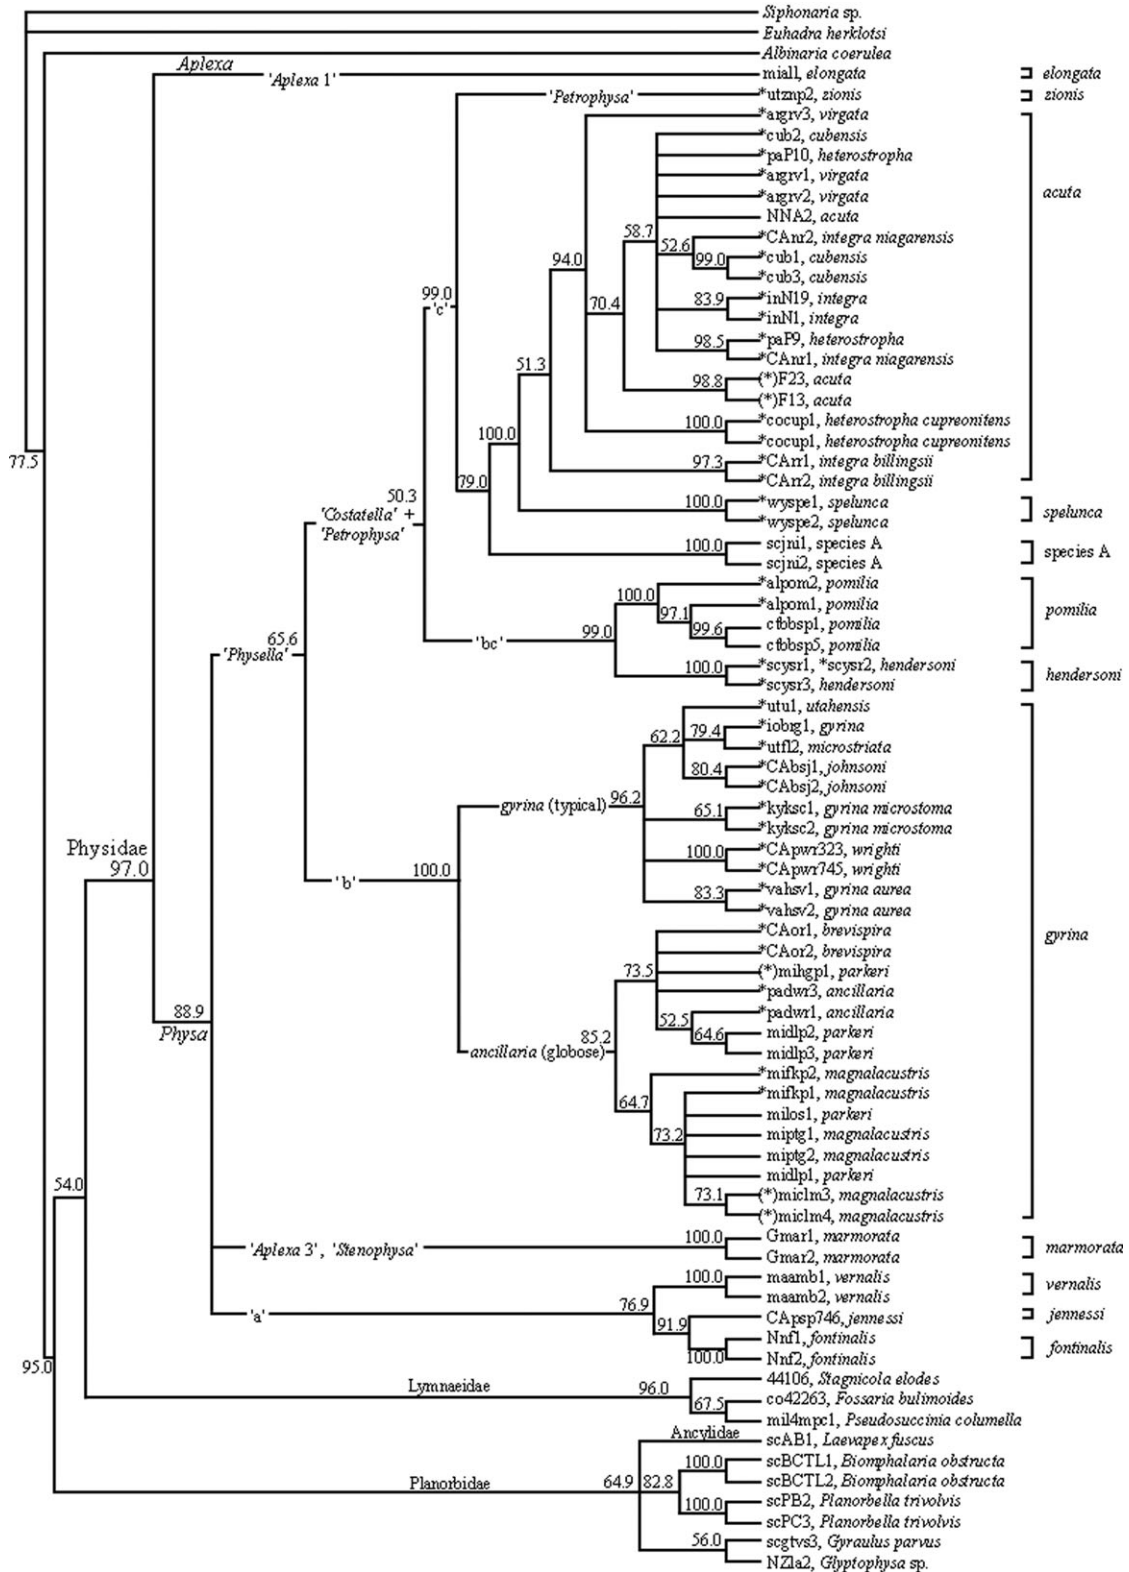

Downloaded from https://academic.oup.com/mollus/article/73/3/241/1111696 by guest on 23 April 2024

**Figure 3.** The tree generated by the likelihood analysis of the Physidae sequence data. Bootstrap values from likelihood analysis (using the TVI + I+G model selected by Modeltest) are given for each node. Nodes are labelled by penial morphology and taxonomic category. The node labelled 'Costatella' + 'Petrophysa' is equivalent to Te's (1978) subgenera *Costatella* + *Petrophysa*. The node labelled 'Physella' is equivalent to Baker's (1928) genus *Physella*. Nodes labelled *gyrina* (typical) and *ancillaria* (globose) within the *gyrina* clade show separation between the two morphotypes despite the small genetic distance. Taxon labels with \* are from type localities and with (\*) from near type localities.

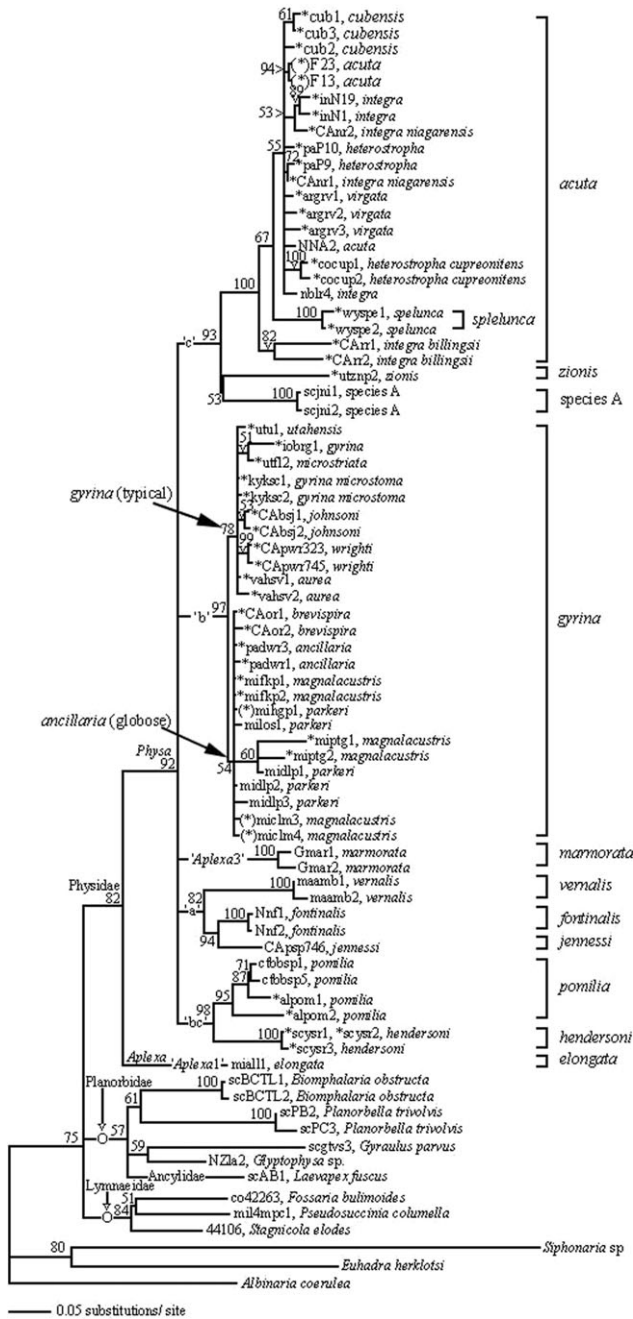

**Figure 4.** Neighbour-joining analysis for the Physidae sequence data set with each penial morphology group highlighted. The TVI + I+G model was selected by Modeltest. Bootstrap values are provided for each group. Nodes are labelled by penial morphology and taxonomic category. There is no node equivalent to Baker’s (1928) genus *Physella* or Te’s (1978) subgenera *Costatella* + *Petrophysa*. Nodes labelled *gyrina* (typical) and *ancillaria* (globose) within the *gyrina* clade show separation between the two morphotypes despite the small genetic distance. Taxon labels with \* are from type localities and with (\*) from near type localities.

and *P. microstriata* are paraphyletic, but *P. johnsoni*, *P. wrighti* and *P. gyrina aurea* are monophyletic. The sampling of *Physa utahensis*, of the typical clade, was not sufficient to determine whether it is monophyletic. However, the level of genetic differentiation among the ‘typical’ nominal species is only about 6% for the combined 16S rRNA and COI on average and the monophyly of all nominal species is not supported in all phylogenetic analyses (Wethington & Guralnick, 2004). Within the ‘globose’

subclade, none of the nominal species were monophyletic including *P. brevispira*, *P. ancillaria*, *P. parkeri*, nor *P. magnalacustris*.

Within the penial morphology bc complex, both *Physa pomilia* and *P. hendersoni* are monophyletic with *P. pomilia* of the southeastern USA (Alabama) more closely related to the *P. pomilia* of the northeastern USA (Connecticut) than to the *P. hendersoni* of the southeastern USA (South Carolina).

None of the following nominal species was monophyletic within the nominally diverse penial morphology c complex: *Physa acuta*, *P. cubensis*, *P. heterostropha*, *P. integra*, nor *P. virgata*. But *P. heterostropha cupreonitens*, *P. integra billingsii*, *P. spelunca*, two specimens from John’s Island (species A), and *P. zionis* were monophyletic. The two most basal members of the penial morphology c group, the specimens from John’s Island and *P. zionis*, both possess a modified version of the type c penial complex, having a more pronounced and opaque sarcobelum (especially *P. zionis*). (See Fig. 1 for comparisons of penial morphology within the type c penial complex)

## DISCUSSION

The molecular phylogeny supports the monophyly of Physidae, which was presumed previously based on a combination of anatomical characters associated with the mantle edge, jaw and radula (Te, 1978). The most closely related family-group to Physidae appears to be Planorbidae + Ancyliidae in most analyses. Hubendick (1978) argued that the latter two families should be combined into a single family named Ancyloplanorbidae based on similarity of anatomical features. Our mitochondrial gene-based molecular phylogeny supports the recognition of a single family and is consistent with a recent molecular study on planorbids (Morgan *et al.*, 2002).

Te (1975, 1978) relied almost exclusively on the penial complex and associated characters to make his five primary groupings: (1) ‘*Aplexa*-type’ penial complex with six variations including *Stenophysa*; (2) ‘*Physa* type-a’ penial complex with no variation; (3) ‘*Physa* type-b’ penial complex with five variations; (4) ‘*Physa* type-bc’ penial complex with three variations; and (5) ‘*Physa* type-c’ penial complex with four variations. The molecular phylogeny based on mitochondrial gene sequences supports recognition of the groups having type a, b, bc and c penial morphology, respectively, but the *Aplexa* group (represented here by one individual having variation 1 and two individuals having variation 3) should be separated into at least two unrelated groups (representatives of Te’s *Aplexa* variations 2, 4, 5 and 6 not included).

### ‘*Aplexa*-type’ penial complex (variations 1 and 3)

‘*Aplexa*-type’ penial morphology is actually a composite of six morphologically distinct variations, which Te (1975, 1978) and Taylor (2003) united in the subfamily Aplexinae based solely on the absence of a preputial gland, which is a plesiomorphic condition, shared by the rest of freshwater basommatophorans (Hubendick, 1978). Molecular data places *Aplexa elongata* (*Aplexa* 1 penial morphology) as the most basal member of Physidae, while *Stenophysa marmorata* (*Aplexa* 3 penial morphology) is generally nested within Physinae (Figs 2–5). Thus, absence of a preputial gland is not a synapomorphy uniting *Stenophysa* plus *Aplexa*, and the *Aplexa* complex should be divided to recognize the separation of these two groups. A major difference between *Aplexa* and *Stenophysa* lies in the character of their single penial sheath: *Aplexa* has a glandular penial sheath, whereas that of *Stenophysa* is muscular (Te, 1978; Taylor, 2003). More genetic sampling is required to examine the diversity and relationships of these two groups.

A (COI)

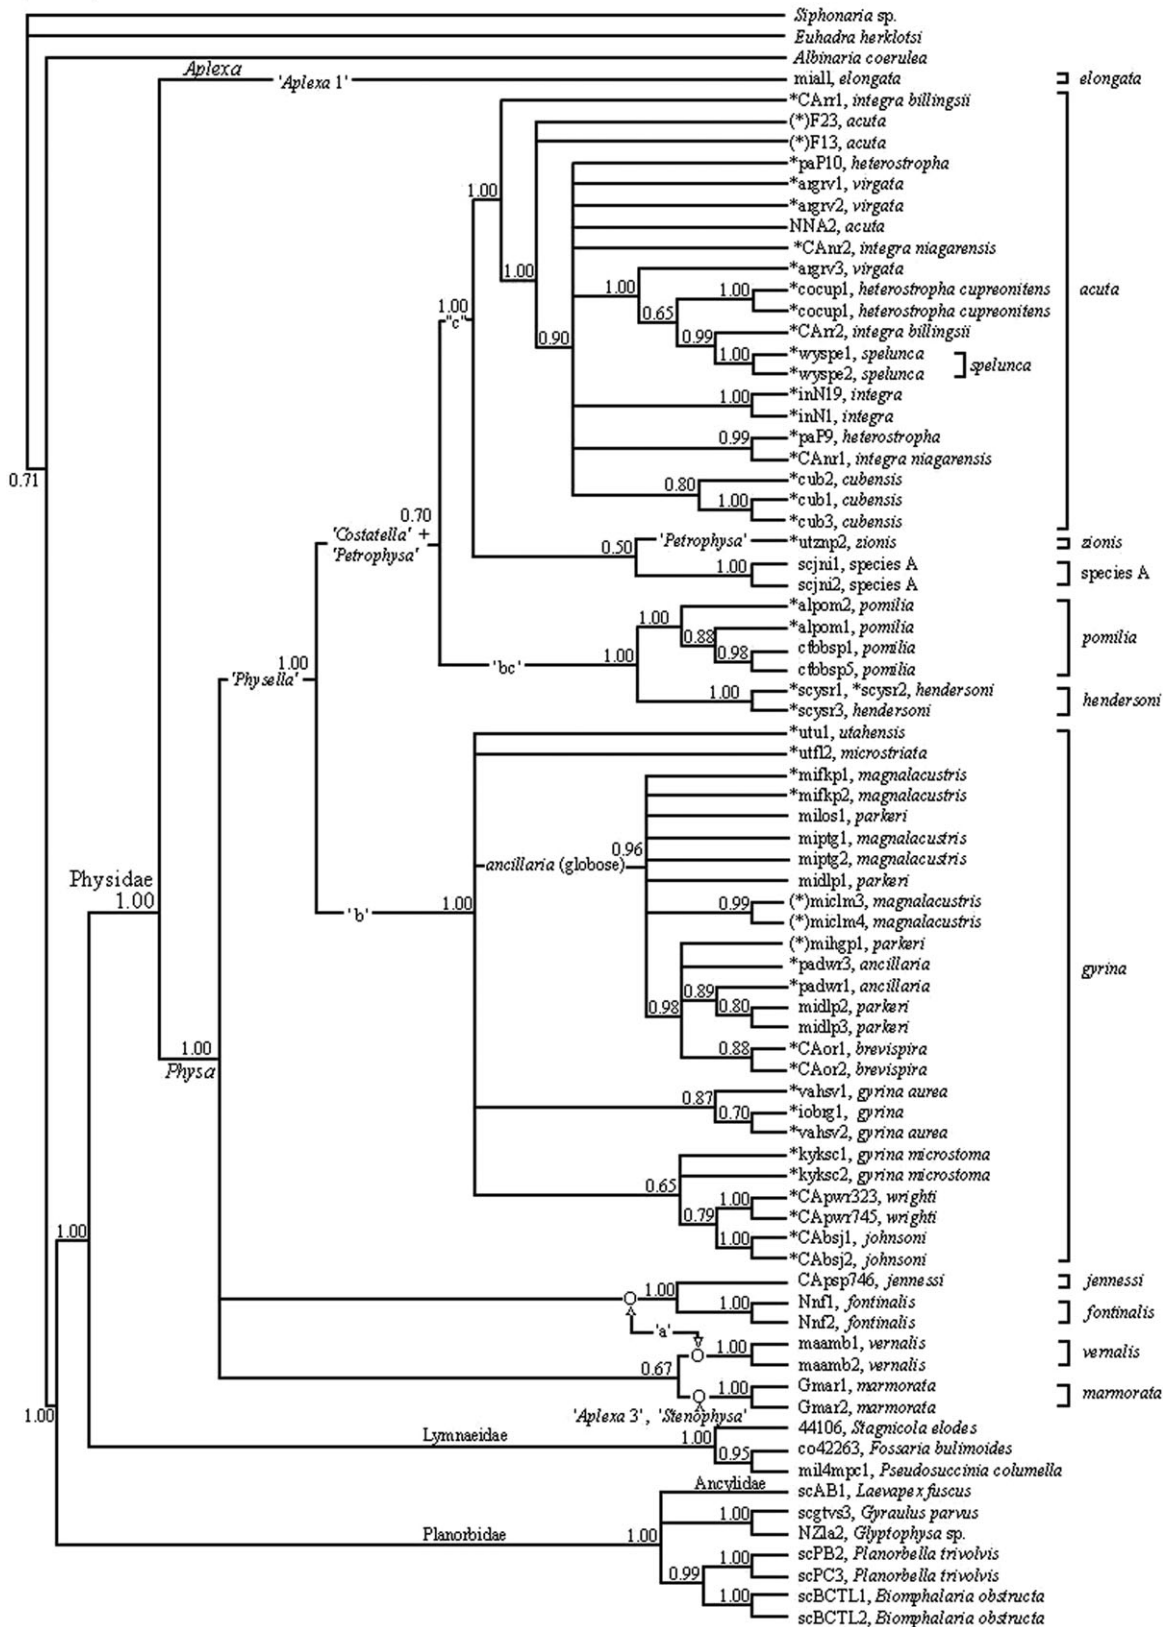

**Figure 5.** Two trees inferred by Bayesian analysis. **A.** COI. **B.** 16S rRNA. The node labelled ‘Costatella’ + ‘Petrophysa’ is equivalent to Te’s (1978) subgenera *Costatella* + *Petrophysa*. The node labelled ‘Physella’ is equivalent to Baker’s (1928) genus *Physella*. Nodes labelled *gyrina* (typical) and *ancillaria* (globose) within the *gyrina* clade show separation between the two morphotypes despite the small genetic distance. Note that there is no node labelled *gyrina* for COI (Fig. 5A) as this group is paraphyletic in this analysis.



B (16S)

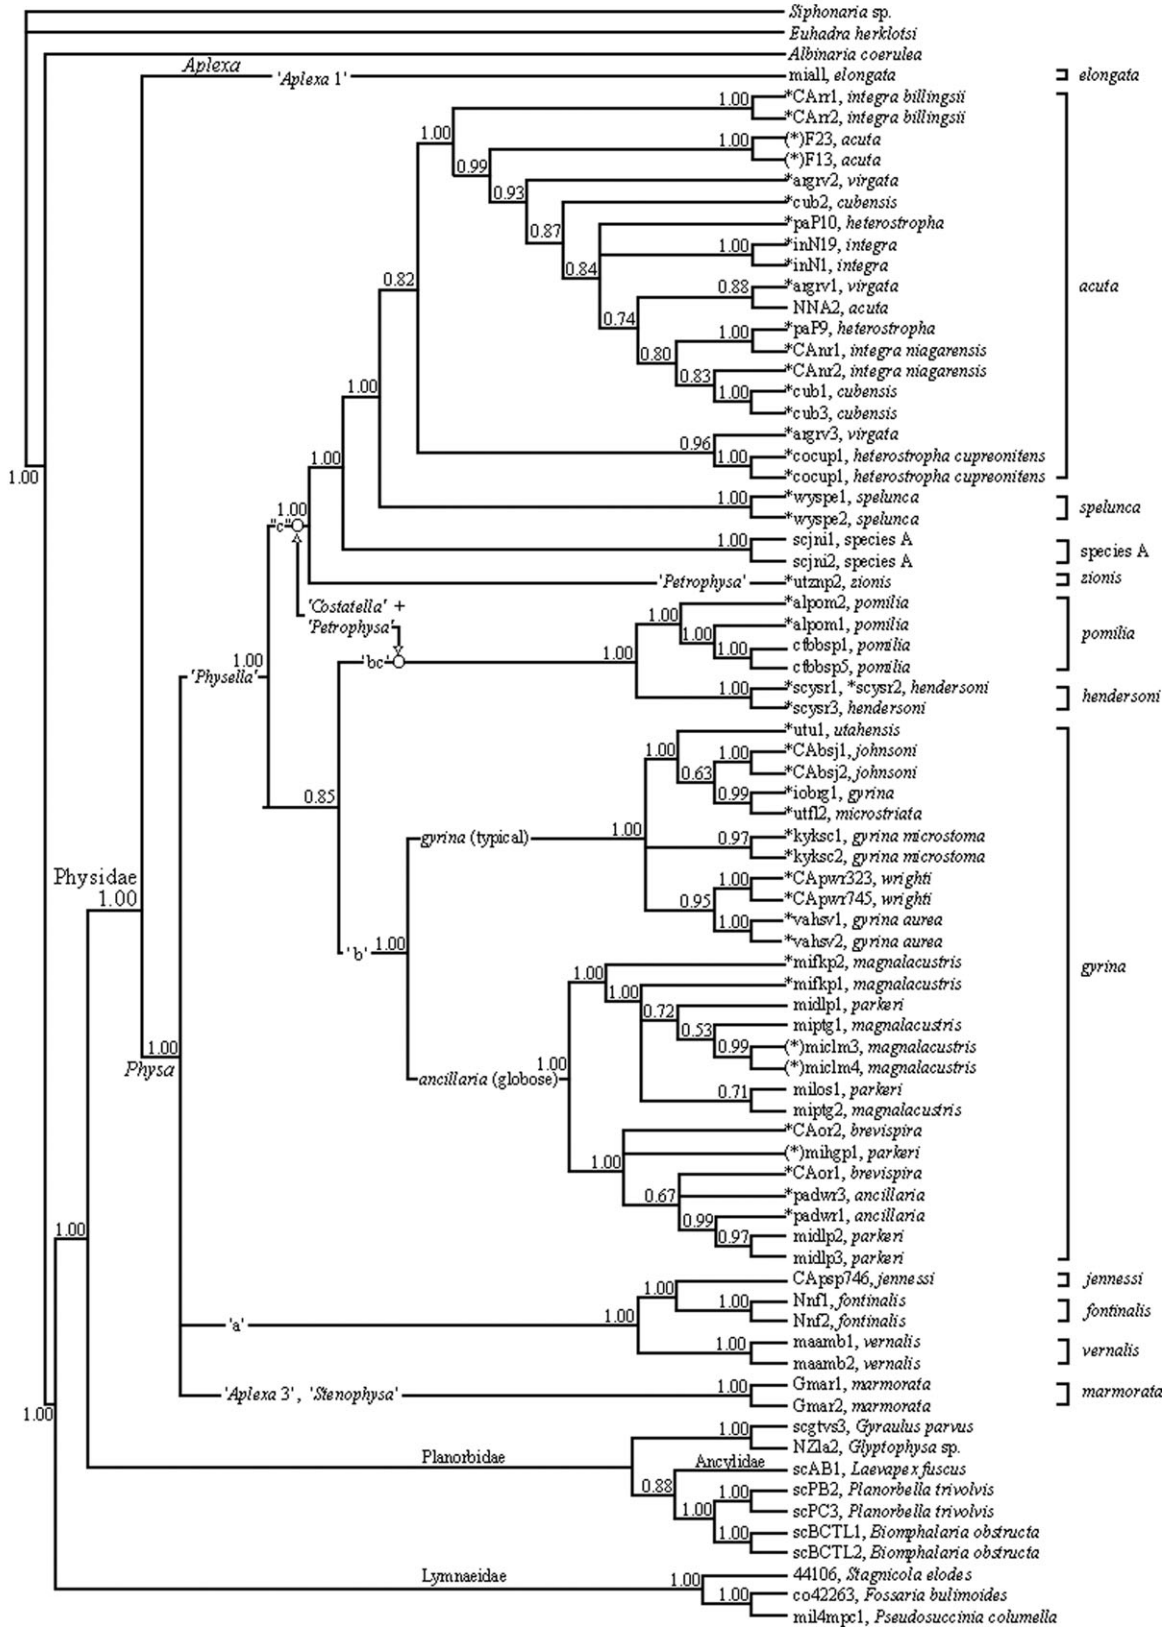

Figure 5. Continued

## ‘Physa type-a’ penial complex

The monophyly of the *fontinalis* group, which exhibits a Holarctic distribution, is generally supported by each molecular analysis (Figs 2–5). The exception is the COI Bayesian analysis where the type a penial morphology was made paraphyletic by the placement of *Physa marmorata* as sister to *P. vernalis* (Fig. 5A). The original description of *P. vernalis* (Taylor & Jokinen, 1984) mentions that the penial sheath had a nonglandular region near the preputium (also noticed in our dissections) and that the appearance of the shells resembled juvenile *Aplexa* sp. *Physa jennessi* is sister to *P. fontinalis* and in turn these two species are sister to *P. vernalis*. *Physa vernalis*, which was described from the northeastern USA (Taylor & Jokinen, 1984), possesses the ‘type-a’ penial morphology, which supports its placement in the *fontinalis* group by Taylor & Jokinen (1984). Taylor (2003) described a new genus, *Laurentiphysa* with *P. vernalis* as the type species. It includes the newly described species *L. chippevarum* Taylor from the Great Lakes region of northern Wisconsin. Taylor (2003) also recognized the monotypic genus *Beringophysa* Starobogatov & Budnikova, 1976, for *Physa jennessi*. There is no apparent phylogenetic or taxonomic value in recognizing three separate genera within the closely related *fontinalis* group.

## ‘Physa type-b’ penial complex

The *gyrina* group includes Taylor’s (2003) tribe Physellini and three of his seven genera, *Physella*, *Utahphysa* and *Archiphysa* (Figs 2–5). Our sampling was not broad enough to comment on the other two genera Taylor named from Central America and included in his tribe Physellini (*Chiaphophysa* and *Ultrapophysa*). We find no support for inclusion of *Petrophysa* in the Physellini or for separation of the three genera *Physella*, *Utahphysa* and *Archiphysa*. Taylor’s monotypic genus *Costatella* belongs to the type bc penial morphology complex, instead of within Taylor’s tribe Physellini (Te, 1978; A.R. Wethington, personal observation).

Our inclusion of *P. brevispira* in the *gyrina* group is based on penial morphology and DNA sequence data of specimens collected from the type locality. *Physa brevispira* was described by Lea in 1864 from the Ottawa River in Canada, based solely on shell characters, and has traditionally been considered a subspecies of *P. integra* (Burch, 1982, 1988; Burch & Tottenham, 1980) following Te (1978). *Physa johnsoni* was placed in the penial morphology c group by Burch (1982, 1988) and Burch & Tottenham (1980), again based on Te (1978), but it is of the penial morphology group b (Taylor, 2003; Wethington & Guralnick, 2004).

We find that the penial morphology group b can be divided into two distinct groups, the ‘typical’ (*P. gyrina*) and ‘globose’ (*P. ancillaria*) shelled forms, in all analyses except the COI Bayesian analysis (Figs 2–5). *Physa gyrina* includes the following species and subspecies: *P. gyrina*, *P. gyrina aurea*, *P. gyrina microstoma*, *P. johnsoni*, *P. microstriata*, *P. utahensis* and *P. wrighti*. *Physa ancillaria* includes the following species and subspecies: *P. ancillaria*, *P. brevispira*, *P. magnalacustris* and *P. parkeri*. These two groups may differ ecologically. The ‘typical’ group (*P. gyrina*) includes taxa that were originally described from hot springs, such as *P. johnsoni*, *P. wrighti* and *P. gyrina aurea*. These taxa have a more tightly coiled shell than those of the ‘globose’ group (*P. ancillaria*). *Physa gyrina* is known to be tolerant of heated waters (Clench, 1926; Agersborg, 1929; Clampitt, 1970; Wethington & Guralnick, 2004). However, *P. parkeri* (of the globose group) is almost impossible to culture in the laboratory and requires conditions cooler than room temperature (Dillon & Wethington, 2006b).

Many members of the ‘globose’ group are larger than those of the ‘typical’ group, besides having a more globose shell. However, *P. utahensis* of the ‘typical’ group is both large and

globose. Clench (1925) originally described *P. utahensis* as a subspecies of *P. lordi* Baird (which we predict should be in the ‘globose’ group = *P. ancillaria*), but it would seem more correct for it to be a subspecies of *P. gyrina*. Utah Lake, the type locality of *P. utahensis*, is shallow (mean depth, 2.74 m) and hot during the summer (average annual temperatures 15–25°C; <http://www.waterquality.utah.gov/watersheds/lakes/utahlake.pdf>) in contrast to the habitats of the more northern ‘globose’ group. For instance, Douglas Lake (Michigan) where *P. parkeri* can be found, is deep (mean depth, 5.5 m) and stays cold throughout the year, even in the summer (summer temperatures were 16.6°C averaged over the years 1921–1949; <http://www.umich.edu/~umbs/research/dlprofile.pdf>; <http://www.umich.edu/~umbs/research/profiles.htm>). Also, it is known that shell shape in physids can be influenced by both biological (DeWitt, 1998; DeWitt, Sih & Hucko, 1999; DeWitt, Robinson & Wilson, 2000) and environmental (Burnside, 1998; Britton & McMahon, 2004) factors despite underlying genetics.

The penial morphology of both ‘typical *gyrina*’ and ‘globose *ancillaria*’ groups is similar, with each member having a preputial gland and two penial sheaths, the first sheath being glandular and the second nonglandular. Te (1978) separated members within the *Physa* type b penial morphology group based on penile sheath ratios, but we did not see any basis for this in the mtDNA data.

Dillon & Wethington (2006a) found no reproductive isolation among six taxa having *gyrina*-type penial morphology (which includes the following nominal species: *P. aurea*, *P. gyrina*, *P. microstriata* and *P. utahensis* of the typical *gyrina* form and *P. ancillaria* and *P. parkeri* of the globose *ancillaria* form), but conclusions were rendered tentative by life history differences so broad as to obstruct the culture of control populations. However, given the small genetic distance separating *P. gyrina* from *P. ancillaria* (and the paraphyly of the group in the COI Bayesian analysis, Fig. 5A), it is possible that this represents one species that is diverse both morphologically and ecologically. Dillon & Wethington (2006b) could find no distinction between *P. gyrina* and either *P. parkeri* or *P. magnalacustris* (as a subspecies of *P. sayii*) in a survey of genetic variation at seven allozyme loci in nine populations sampled from Michigan. Unpublished sequence data show a geographic signal that corresponds with *P. gyrina* and *P. ancillaria*, with the latter being restricted to more northern climes and the former found in both northern and more southern climes, although one population (a small ditch near Wagner Falls, Michigan) supported both sequences (A.R. Wethington, unpublished).

## ‘Physa type-bc’ penial complex

Within the *pomilia* complex, both *Physa pomilia* and *P. hendersoni* are phylogenetically distinct (Figs 2–5). The *P. pomilia* of Connecticut appears to be more closely related to the *P. pomilia* of Alabama than either is to the *P. hendersoni* of South Carolina. Experimental breeding data gathered by Dillon, Robinson & Wethington (2007) suggest that *P. hendersoni* and *P. pomilia* are conspecific, as originally suggested by Clench (1925).

In the parsimony run (Fig. 2), likelihood run (Fig. 3) and COI Bayesian run (Fig. 5A), the bc penial morphology group was sister to the penial morphology c group (which here includes *P. zionis*) as predicted by Te’s (1978) morphological data set, but with moderate to no bootstrap support. The sister relationship among the three groups (see Figs 2, 3, 5A and B) correlates with Te’s subgenera *Costatella* plus *Petrophysa*, ignoring the placement of *P. zionis* as more closely related to the c group instead of the bc group as Te (1978) predicted. However support for the subgenera *Costatella* + *Petrophysa* is lost in the distance analysis (Fig. 4). All analyses support Te’s (1978) section *Costatella*

(Figs 2–5) with high bootstrap support. The bc penial morphology group appears to be separate from all other groups based on the molecular phylogeny instead of being included with the c penial morphology group as in Taylor (2003), Burch (1982, 1988) and Burch & Tottenham (1980).

Te (1978) was incorrect in his placement of *P. cubensis* and *P. zionis* in the bc penial group, and *P. pomilia* in the c penial group, but was correct in his placement of *P. hendersoni* and *P. costata* in the bc penial group. Other members that Te placed in his *Physa* bc group that were not included in our analysis are: *P. ariomis*, *P. bermudeai*, *P. floridana* and *P. peninsularis*. If Te was correct, the range of the *pomilia* group extends further through the Southeastern USA and possibly into the Caribbean. Taylor (2003) incorrectly placed *Physa costata* Newcombe (first described from Clear Lake, California), as the sole member of the genus *Costatella*, into his tribe Physellini. Based on penial morphology, *P. costata* should be placed in the bc penial morphology group (as predicted by Te, 1978; A.R. Wethington, personal observation) together with *P. pomilia* and *P. hendersoni*.

#### 'Physa type-c' penial complex

The molecular phylogeny supported recognition of the penial morphology c group (equivalent to Te's, 1978, section *Alampetista*) (Figs 2–5). Within the nominally diverse *P. acuta* complex, none of the following nominal species were monophyletic: *P. acuta*, *P. cubensis*, *P. heterostropha*, *P. integra*, or *P. virgata*. Dillon *et al.* (2002) found that *P. acuta*, *P. heterostropha* and *P. integra* all interbreed and are able to produce a successful F1 generation with no depression of egg laying compared to incross controls, as well as a successful F2, which suggests that they all represent one biological species. Similarly, *P. virgata* shows no reproductive isolation from *P. acuta* (Dillon *et al.*, 2005). Wethington (2003 and unpublished) also showed that the three nominal species *P. acuta*, *P. heterostropha* and *P. integra* are one phylogenetic species based on allozyme and mitochondrial DNA data. Based on the failure of the six topotypic nominal species and subspecies *P. acuta*, *P. heterostropha*, *P. integra*, *P. virgata*, *P. cubensis* and *P. integra niagarensis* to constitute an exclusive clade, it appears that only one phylogenetic species is involved, to which the valid name *P. acuta* would apply. Inclusion of *P. cubensis* under the name *P. acuta* is in accordance with Paraense & Pointier (2003) who showed that *P. cubensis* is morphologically indistinguishable from *P. acuta* based on anatomy, including penial morphology. So, not only should *P. cubensis* be reassigned to the penial c morphology group from Te's (1978) penial bc morphology group (our *pomilia* species group), but it should also be synonymized with *P. acuta* based on the molecular phylogeny.

Setting aside the COI Bayesian analysis, three nominal species within the *acuta* complex were monophyletic (Figs 2–5) including *P. integra billingsii* (CArr1 and CArr2), *P. spelunca* (wyspel and wyspe2) and *P. heterostropha cupreonitens* (cocup1 and cocup2). *Physa cupreonitens* was sister to the phylogenetic species *P. acuta* in the parsimony and likelihood analyses (Figs 2, 3), but nested within the *acuta* clade in the distance analysis and both Bayesian analyses (Figs 4, 5A, 5B), so we tentatively consider it to be synonymous with *P. acuta*. *Physa billingsii* appeared to be phylogenetically distinct in most of the analyses, but is likely to be synonymous with *P. acuta*. In the COI Bayesian analysis (Fig. 5A) *P. billingsii* was paraphyletic. *Physa spelunca* was phylogenetically distinct; it has a unique ecology, living in a heated spring within a cave filled with toxic sulphuric gas and feeding primarily on bacteria (Turner & Clench, 1974). *Physa spelunca* also has very little mtDNA genetic diversity when more individuals are sampled (M. Porter, personal communication). It is

possible that *P. spelunca* is a valid species as suggested by Wethington & Guralnick (2004), although this is not consistent with its placement within *P. acuta* in the COI Bayesian analysis (Fig. 5A).

#### *Physa species A*

A physid population from John's Island (South Carolina) consistently appeared basal within the penial morphology c group (Figs 2–5), even when five more individuals from the population were added (16S mtDNA only). There is postmating reproductive isolation between this population and the population of *P. acuta* from Charles Towne Landing (R.T. Dillon, personal communications); both populations are from Charleston County. Other populations of species A have recently been reported from South Carolina (R.T. Dillon and A.R. Wethington, unpublished). The collective data suggest that it is an undescribed species.

#### *Physa zionis*

*Physa zionis* also fell basally within the penial morphology c group (Figs 2–5). The ecology of *P. zionis* is strikingly different from all other physids as it crawls vertically on the rock face where seepage occurs, along the narrows in Zion National Park. These physids reach maturity at a small size (<5 mm in length) and lay correspondingly small egg masses (between 1 and 4 eggs per capsule (C. Rogers, personal communications), as compared to as many as 200 or more eggs in some *P. acuta* (A.R. Wethington, personal observations)). *Physa zionis* was originally placed in the subgenus *Petrophysa* by its discoverer, Pilsbry (Chamberlain & Jones, 1929). The characters separating *Petrophysa* from the subgenus *Physella* are a nondigitate mantle, and the radula teeth having few, large cusps and numerous small, interstitial cusps. Te and Taylor disagree about its penial anatomy; Te (1978) suggested that *P. zionis* has a 'Physa type-bc' penial morphology while Taylor (2003) suggested that it has a 'Physa type-b' penial morphology. Both authors maintain the name *Petrophysa*, as either a subgenus (Te, 1978) or genus (Taylor, 2003). Neither author was correct with regard to its penial morphology as *P. zionis* has a modified 'Physa type-c' penial morphology, with the sarcobelum becoming more inflated in more mature specimens. There are physids (*P. gyrina*) that are sympatric with *P. zionis*, but are in ponds, swampy areas and the Virgin River that runs through the narrows. There does not seem to be any reason to keep the subgenus *Petrophysa* for *P. zionis*. Instead, *P. zionis* is more properly placed in the same group as *P. acuta*.

#### Novel patterns in penial morphology

The penial morphology of the *acuta* group shows east-west variation, with the eastern forms (*P. acuta*, *P. heterostropha* and *P. integra*) having transparent, muscular penial sheaths while the sheaths of the western forms (*P. virgata* and *P. spelunca*) are less transparent and more opaque.

There is a superficial resemblance in penial morphology between members of the bc penial morphology group and *P. spelunca*, *P. species A* and *P. zionis*, with two separate components to the penial apparatus in each. The members of the *pomilia* group have a *Physa* type-bc penial complex with two separate penial sheaths or sections within one penial sheath (the glandular portion being smaller than the muscular portion). *Physa spelunca*, *P. species A* and *P. zionis* all have a modified *Physa* type-c penial complex with an inflated sarcobelum in comparison with *P. acuta*. *Physa zionis* has the largest sarcobelum of the three, roughly equal in length to the preputium in mature

adults (Fig. 1). Within *P. zionis* there seems to be an age/size component to the degree of variation from a standard type *Physa* type-c penis. Smaller specimens of *P. zionis* had penial morphologies indistinguishable from the typical *Physa* type-c penis (Fig. 1).

#### Molecular phylogeny and systematics of Physidae

The separation of Aplexinae and Physinae sensu Starobagotov (1967) or *Aplexa* and *Physa* sensu Thiele (1931–1935) and Zilch (1959–1960) is supported if *Stenophysa* is included with the Physinae (or *Physa*) instead of the Aplexinae (or *Aplexa*). The plesiomorphic character, lack of a preputial gland, in Te's (1978) *Aplexa* group is not a synapomorphy uniting *Aplexa* and *Stenophysa* within Aplexinae. Instead, the sole *Stenophysa* representative was nested within the Physinae. It would appear that *S. marmorata* (here renamed *Physa marmorata*) retained a plesiomorphic character, resulting in its previous erroneous taxonomic placement. This placement of *Stenophysa* (*Aplexa* 3 penial morphology) within the Physinae was suggested by Te (1978) as a possible alternative.

Baker (1900,1928) suggested that the penial morphology a group should be referred to as the genus *Physa* Draparnaud and the remaining Physinae as the genus *Physella* Haldeman, based on anatomical differences in the mantle edge. This classification scheme was subsequently followed by Te (1978), Burch & Tottenham (1980), Burch (1982,1988) and Burch & Yung (1992). Based on the topology of the mtDNA-based parsimony phylogeny, the genera *Physa* (penial morphology a) and *Physella* (penial morphologies b + bc + c) as proposed by Baker (1900,1928) are supported by the strict consensus tree, but with little to no bootstrap (Fig. 2). The bootstrap support for Baker's *Physella* is only 65.6 in the likelihood analysis (Fig. 3), but the posterior probability is 1.00 in both Bayesian analyses (Figs 5A, B), but there is no support for the genus in the distance analysis (Fig. 4), with the two genera becoming paraphyletic.

Ignoring the placement of *P. zionis*, Te's (1978) subgenus *Costatella* (*acuta* + *pomilia* groups) is recovered in the mtDNA-based parsimony phylogeny (Figs 2, 3, 5A), but not in the neighbour-joining phylogeny (Fig. 4) or the 16S Bayesian analysis (Fig. 5B). Te's (1978) sections *Alampetista* and *Costatella* are recovered in all analyses, but are not united under his subgenus *Costatella* in the neighbour-joining analysis (Fig. 4) or 16S Bayesian analysis (Fig. 5B).

It seems that each penial morph represents a unique species or species group, but that Taylor's (2003) higher-order classification does not seem warranted. Taylor's subfamily ranks are paraphyletic due to the placement of *S. marmorata* (*Aplexa* 3 penial morphology). Each penial morphology represented here correlates loosely with Taylor's (2003) tribe designations: penial morphology a represents the tribe Physini, penial morphology b the tribe Physellini, penial morphology c the tribe Haitini, penial morphology *Aplexa* 3 the tribe Stenophysini, and penial morphology *Aplexa* 1 the tribe Aplexini. Taylor did not correctly distinguish all members having penial morphology bc, and he improperly placed the two genera *Costatella* and *Petrophysa* in his tribe Physellini.

In this study, we examined six general penial morphology types which correspond to separate species or species groups: *Aplexa* variation 1 (*A. elongata*), *Aplexa* variation 3 (*P. marmorata*), type a (*P. fontinalis*, *P. jennessi*, *P. vernalis*), type b (*P. gyrina*, '*P. ancillaria*'), type bc (*P. pomilia*, *P. hendersoni*) and type c (*P. acuta*, *P. spelunca*, *P. species A*, *P. zionis*). We uncovered as many as thirteen phylogenetic units that approximate species (Table 1, Figs 1–5), but further study may narrow this to as few as nine species. There is evidence, for instance, that *P. ancillaria* is a junior synonym of *P. gyrina* (Dillon & Wethington, 2006b;

R.T. Dillon & A.R. Wethington, unpublished data), and that *P. hendersoni* may be a junior synonym of *P. pomilia* (Dillon *et al.*, 2007).

## CONCLUSIONS

The molecular phylogeny supports six groups based on penial morphology (Figs 1–5; Table 1). These six groups (Fig. 1) correlate well with reproductive isolation experiments conducted by Dillon and colleagues. No evidence of reproductive isolation was found among six populations within *Physa acuta* (Dillon *et al.*, 2002), or among six taxa of penial morphology b (Dillon & Wethington, 2006a), but complete reproductive isolation was found between *P. acuta* and *P. gyrina* (Dillon, Earnhardt & Smith, 2004). R.T. Dillon (personal communications, 2003) has expanded these results to document reproductive isolation (in varying degrees) among *Aplexa elongata*, *P. acuta*, *P. species A*, *P. gyrina* and *P. pomilia*.

These six morphological groups correspond to the following recommended species: *A. elongata*; *P. marmorata*; *P. fontinalis*, *P. jennessi* and *P. vernalis* of penial morphology a; *P. gyrina* (including *P. gyrina*, *P. aurea*, *P. microstoma*, *P. johnsoni*, *P. microstriata*, *P. utahensis* and *P. wrighti*) and possibly *P. ancillaria* (including *P. ancillaria*, *P. brevispira*, *P. magnalacustris* and *P. parkeri*) of penial morphology b; *P. acuta* (including *P. acuta*, *P. billingsii*, *P. cubensis*, *P. cupreonitens*, *P. heterostropha*, *P. integra*, *P. niagarensis* and *P. virgata*); *P. spelunca*, *P. species A* and *P. zionis* of penial morphology c; and *Physa pomilia* and *P. hendersoni* of penial morphology bc (Table 1). The number of physid species in North America has been over-estimated. The data presented here show that of the 28 nominal species included, no more than 12, plus one new species (John's Island *Physa*), are valid.

## ACKNOWLEDGEMENTS

The authors would like to acknowledge the following people for reading early drafts of the paper and providing input: Rob Dillon, Laura Gough, Amy Ward, Phil Harris, Philippe Jarne, J. P. Pointier, Peter Mordan, Ellen Strong, Sarah Joyce, Stephanie Clark, Jill Detwiler and an anonymous reviewer. The following people provided assistance in the field, ranging from collecting to identification aid: Susan Wethington, Zeldia Wethington, Jennifer Stephens, Tom Smith, Matt Rhett, Steve Finch, Megan Porter, Christopher Rogers, Elliot Rogers, Jeffrey Sides, Deb Kirkland, Stephanie Clark, Nirmala Karnik, Nang Sechanixay, Katy Metzner-Roop, Andrew Roop, Bryan Dillon, Rob Dillon, Andrew Lydeard, Eileen Jokinen and Jack Burch. The following people assisted indirectly in collecting efforts: Tim Roop, Jordan Roop, Charles Wethington, Curt Lively and Lynda Delph. The following people sent specimens that were used in this study: Curt Lively, Roy Anderson, Philippe Jarne, Doug Smith, Eileen Jokinen, Rob Dillon, David Maceira and Sophia B. Twitchell, Jen Buhay, Charles Pacas, David Prescott, Rob Guralnick, Wayne Lepitzki and Elinor Michel. We would also like to acknowledge funding sources: NSF (awarded to Lydeard, Dillon and Strong); Conchologists of America and Western Society of Malacologists (awarded to Wethington); the University of Alabama Graduate Association and Biology Department, and the Multi-User Equipment Grant from NSF (awarded to Lydeard, Mayden, Powell and Harris (DBI-007-351). This manuscript represents part of Amy Wethington's dissertation research at the University of Alabama. This manuscript was completed while Charles Lydeard served as a Program Officer at the National Science Foundation under the Intergovernmental Personnel Agreement Act and was supported in part by the IR/D program.

## REFERENCES

- AGERSBORG, H.P.K. 1929. The relation of temperature to continuous reproduction in the pulmonate snail, *Physa gyrina* Say. *Nautilus*, **43**: 45–49.
- BAKER, F.C. 1900. A revision of the Physae of northeastern Illinois. *Nautilus*, **14**: 57–59.
- BAKER, F.C. 1928. *The Fresh Water Mollusca of Wisconsin: Part 1. Gastropoda*. Wisconsin Academy of Sciences, Arts, and Letters, Madison.
- BRITTON, D.K. & McMAHON, R.F. 2004. Environmental and genetically induced shell shape variation in the freshwater snail *Physa (Physella) virgata* (Gould, 1855). *American Malacological Bulletin*, **19**: 93–100.
- BURCH, J.B. 1982. North American freshwater snails: identification keys, generic synonymy, supplemental notes, glossary, references, index. *Walkerana*, **1**: 1–365.
- BURCH, J.B. 1988. North American freshwater snails: introduction, systematics, nomenclature, identification, morphology, habitats, distribution. *Walkerana*, **2**: 1–80.
- BURCH, J.B. & TOTTENHAM, J. 1980. North American freshwater snails: species list, ranges, and illustrations. *Walkerana*, **1**: 1–215.
- BURCH, J.B. & YUNG, Y. 1992. Freshwater snails of the University of Michigan Biological Station Area. *Walkerana*, **6**: 1–218.
- BURNSIDE, C. 1998. *Ecophenotypic variation in shell morphology within the freshwater pond snail, genus, Physella (Pulmonata: Basommatophora) and its taxonomic implications*. PhD thesis, University of Texas, Arlington.
- CHAMBERLAIN, R.V. & JONES, D.T. 1929. *A descriptive catalog of the mollusca of Utah. Biological series, Vol. 1, No. 1*. University of Utah, Salt Lake City.
- CLAMPITT, P.T. 1970. Comparative ecology of the snails *Physa gyrina* and *Physa integra*. *Malacologia*, **10**: 113–151.
- CLENCH, W.J. 1925. Notes on the genus *Physa* with descriptions of three new species. *Occasional Papers of the Museum of Zoology, University of Michigan*, **161**: 1–10.
- CLENCH, W.J. 1926. Three new species of *Physa*. *Occasional Papers of the Museum of Zoology, University of Michigan*, **168**: 1–8.
- DEWITT, T.J. 1998. Costs and limits of phenotypic plasticity: tests with predator-induced morphology and life history in a freshwater snail. *Journal of Evolutionary Biology*, **11**: 465–480.
- DEWITT, T.J., SIH, A. & HUCKO, J.A. 1999. Trait compensation and cospecialization: size, shape, and antipredator behaviour. *Animal Behaviour*, **58**: 397–407.
- DEWITT, T.J., ROBINSON, B.W. & WILSON, D.S. 2000. Functional diversity among predators of a freshwater snail imposes an adaptive trade-off for shell morphology. *Evolutionary Ecology Research*, **2**: 129–148.
- DILLON, R.T., EARNHARDT, C. & SMITH, T. 2004. Reproductive isolation between *Physa acuta* and *Physa gyrina* in joint culture. *American Malacological Bulletin*, **19**: 63–68.
- DILLON, R.T., ROBINSON, J.D., SMITH, T. & WETHINGTON, A.R. 2005. No reproductive isolation between the freshwater pulmonate snails *Physa virgata* and *P. acuta*. *Southwestern Naturalist*, **50**: 415–422.
- DILLON, R.T., ROBINSON, J.D. & WETHINGTON, A.R. 2007. Empirical estimates of reproductive isolation among the freshwater pulmonate snails *Physa acuta*, *P. pomilia*, and *P. hendersoni*. *Malacologia*, **49**: 289–292.
- DILLON, R.T. & WETHINGTON, A.R. 2006a. No-choice mating experiments among six nominal taxa of the subgenus *Physella* (Basommatophora: Physidae). *Heldia*, **6**: 69–78.
- DILLON, R.T. & WETHINGTON, A.R. 2006b. The Michigan Physidae revisited: a population genetic survey. *Malacologia*, **48**: 133–142.
- DILLON, R.T., WETHINGTON, A.R., RHETT, J.M. & SMITH, T.P. 2002. Populations of the European freshwater pulmonate *Physa acuta* are not reproductively isolated from American *Physa heterostropha* or *Physa integra*. *Invertebrate Biology*, **121**: 226–234.
- ESTABROOK, G. 1966. A mathematical model in graph theory for biological classification. *Journal of Theoretical Biology*, **12**: 297–310.
- ESTABROOK, G. 1972. Cladistic methodology: a discussion of the theoretical basis for induction of evolutionary history. *Annual Review of Ecological Systematics*, **3**: 427–456.
- FOLMER, O., HOEH, W.R., BLACK, M.B. & VRIJENHOEK, R.L. 1994. DNA primers for amplification of mitochondrial cytochrome c oxidase subunit I from metazoan invertebrates. *Molecular Marine Biology and Biotechnology*, **3**: 294–299.
- HALL, T.A. 1999. BioEdit: a user-friendly biological sequence alignment editor and analysis program for Windows 95/98/NT. *Nucleic Acids Research Symposium Serial*, **41**: 95–98.
- HATZOGLOW, E., RODAKIS, G.C. & LECANIDOU, R. 1995. Complete sequence and gene organization of the mitochondrial genome of the land snail *Albinaria coerulea*. *Genetics*, **140**: 1353–1366.
- HUBENDICK, B. 1978. Systematics and comparative morphology of the Basommatophora. In: *Pulmonates* (V. Fretter & J. Peake, eds), **2A**: 1–47. Academic Press, New York.
- LYDEARD, C., HOLZNAGEL, W.E., SCHNARE, M.N. & GUTELL, R.R. 2000. Phylogenetic analysis of Molluscan mitochondrial LSU rDNA sequences and secondary structures. *Molecular Phylogenetics and Evolution*, **15**: 83–102.
- MORGAN, J.A.T., DEJONG, R.J., JUNG, Y., KHALLAAYOUNE, K., KOCK, S.M., MKOJI, G. & LOKER, E.S. 2002. A phylogeny of planorbid snails, with implications for the evolution of *Schistosoma* parasites. *Molecular Phylogenetics and Evolution*, **25**: 477–488.
- PALUMBI, S., MARTIN, A., ROMANO, S., McMILLAN, W.O., STICE, L. & GRABOWSKI, G. 1991. *The Simple Fool's Guide to PCR*, Honolulu, Hawaii.
- PARAENSE, W.L. & POINTIER, J.-P. 2003. *Physa acuta* Draparnaud, 1805 (Gastropoda: Physidae): a study of topotypic specimens. *Memorias do Instituto Oswaldo Cruz*, **98**: 513–517.
- POSADA, D. & CRANDALL, K.A. 1998. Modeltest: testing the model of DNA substitution. *Bioinformatics*, **14**: 817–818.
- RONQUIST, F. & HUELSENBECK, J.P. 2003. MrBayes 3: Bayesian phylogenetic inference under mixed models. *Bioinformatics*, **19**: 1572–1574.
- STAROBOGATOV, Y.I. 1967. On the systematization of freshwater pulmonate molluscs. *Trudy Zoologicheskogo Instituta Leningrad*, **42**: 280–304.
- SWOFFORD, D.L. 2001. PAUP\*: *Phylogenetic Analysis Using Parsimony (\* and Other Methods)*, Version 4.0b5. Sinauer, Sunderland, MA.
- TAYLOR, D.W. 2003. Introduction to Physidae (Gastropoda: Hygrophila) biogeography, classification, morphology. *Revista de Biologia Tropical, Supplement*, **51**: 1–287.
- TAYLOR, D.W. & JOKINEN, E. 1984. A new species of freshwater snail (*Physa*) from seasonal habitats in Connecticut. *Freshwater Invertebrate Biology*, **5**: 190.
- TE, G.A. 1975. Michigan Physidae, with systematic notes on *Physella* and *Physodon* (Basommatophora: Pulmonata). *Malacological Review*, **8**: 7–30.
- TE, G.A. 1978. *The systematics of the Family Physidae (Basommatophora: Pulmonata)*. PhD thesis, University of Michigan.
- THIELE, J. 1931–1935. *Handbuch der Systematischen Weichtierkunde*. Part 1, pp. 1–376. Gustav Fischer, Jena.
- THOMPSON, J.D., HIGGINS, D.G. & GIBSON, T.J. 1994. CLUSTALW: improving the sensitivity of progressive multiple sequence alignment through sequence weighting, position-specific gap penalties and weight matrix choice. *Nucleic Acids Research*, **22**: 4673–4680.
- TURNER, R.D. & CLENCH, W.J. 1974. A new blind *Physa* from Wyoming with notes on its adaptation to the cave environment. *Nautilus*, **88**: 80–85.
- WADE, C.M. & MORDAN, P.B. 2000. Evolution within the gastropod molluscs: using the ribosomal RNA gene cluster as an indicator of phylogenetic relationships. *Journal of Molluscan Studies*, **66**: 565–570.
- WALKER, B. 1918. A synopsis of the classification of the freshwater Mollusca of North America, North of Mexico. *Miscellaneous Publications of the Museum of Zoology, University of Michigan*, **6**: 1–213.

- WETHINGTON, A.R. 2003. *Phylogeny, taxonomy, and evolution of reproductive isolation in Physa (Pulmonata: Physidae)*. PhD thesis, University of Alabama, Tuscaloosa.
- WETHINGTON, A.R. & GURALNICK, R. 2004. Are populations of physids from different hot-springs distinctive lineages?. *American Malacological Bulletin*, **19**: 135–144.
- YAMAZAKI, N., UESHIMA, R., TERRETT, J.A., YOKOBORI, S.I., KAIFU, M., SEGAWA, R., KOBAYASHI, T., NUMACHI, K.I., UEDA, T., NISHIKAWA, K., WATANABE, K. & THOMAS, R.H. 1997. Evolution of pulmonate gastropod mitochondrial genomes: comparisons of gene organizations of *Euhadra*, *Cepaea* and *Albinaria* and implications of unusual tRNA secondary structures. *Genetics*, **145**: 749–758.
- ZILCH, A. 1959–1960. Gastropoda. Part 2, Euthyneura. In: *Handbuch der Palaeozoologie* (A. Schindewolf, ed.), **6**: 1–4. Borntraeger, Berlin.

**Appendix.** Information about each specimen name used in the mtDNA analyses.

| Specimen name | genbank no. CO1, 16S | Family     | First classified as                       | Taxon name                              | Locality                                                                                                                 |
|---------------|----------------------|------------|-------------------------------------------|-----------------------------------------|--------------------------------------------------------------------------------------------------------------------------|
| 44106         | EU038352, EU038305   | Lymnaeidae |                                           | <i>Stagnicola elodes</i> (Say, 1821)    |                                                                                                                          |
| Albinaria     |                      |            |                                           | <i>Albinaria coerulea</i> (Rossmassler) | See Hatzoglow <i>et al.</i> , 1995 (acc. no. NC_001761)                                                                  |
| alpom1        | EU038353, EU038306   | Physidae   | <i>Physa pomilia</i> Conrad, 1834         | <i>Physa pomilia</i>                    | Randons Creek, near Claiborne, Monroe County, Alabama [31°32'24"N, 87°30'56"W] (type locality)                           |
| alpom2        | EU038354, EU038307   |            |                                           |                                         |                                                                                                                          |
| argrv1        | AY651170, AY651209   | Physidae   | <i>Physa virgata</i> Gould, 1855          | <i>Physa acuta</i>                      | Gila River, Arizona (type locality)                                                                                      |
| argrv2        | AY651171, AY651210   |            |                                           |                                         |                                                                                                                          |
| argrv3        | EU038355, EU038308   |            |                                           |                                         |                                                                                                                          |
| CAbsj1        | AY651172, AY651211   | Physidae   | <i>Physa johnsoni</i> Clench, 1926        | <i>Physa gyrina</i>                     | Middle Spring, Hot Sulphur Springs, Banff, Alberta, Canada [51°10'N, 115°34'W] (type locality)                           |
| CAbsj2        | AY651173, AY651212   |            |                                           |                                         |                                                                                                                          |
| CAnr1         | EU038356, EU038309   | Physidae   | <i>Physa niagarensis</i> Lea, 1864        | <i>Physa acuta</i>                      | Niagara River, Canada [43°15'38"N, 79°04'27"W] (type locality)                                                           |
| CAnr2         | EU038357, EU038310   |            |                                           |                                         |                                                                                                                          |
| CAor1         | EU038358, EU038311   | Physidae   | <i>Physa brevispira</i> Lea, 1864         | <i>Physa 'ancillaria'</i>               | Ottawa River, Ottawa, Ontario, Canada. (type locality)                                                                   |
| CAor2         | EU038359, EU038312   |            |                                           |                                         |                                                                                                                          |
| CApsp746      | AF346758, AF346746   | Physidae   | <i>Physa jennessi</i> Dall, 1919          | <i>Physa jennessi</i>                   | Alberta, Canada                                                                                                          |
| CApwr323      | AF419322, AF419323   | Physidae   | <i>Physella wrighti</i> Te & Clarke, 1985 | <i>Physa gyrina</i>                     | Alpha Stream, Liard Hot Springs Provincial Park, British Columbia, Canada (type locality)                                |
| CApwr745      | AF346757, AF346745   |            |                                           |                                         |                                                                                                                          |
| CArr1         | EU038360, EU038313   | Physidae   | <i>Physa billingsii</i> Heron, 1880       | <i>Physa acuta</i>                      | Billings' Bridge, near Ottawa [45°25'N, 75°42'W] Ontario, Canada (type locality)                                         |
| CArr2         | EU038361, EU038314   |            |                                           |                                         |                                                                                                                          |
| co42263       | EU038362, EU038315   | Lymnaeidae |                                           | <i>Fossaria bulimoides</i> (Lea)        | Mesa County, Colorado [39°04'47"N, 107°59'11"W]                                                                          |
| Cocup1        | AY651183, AY651221   | Physidae   | <i>Physa cupreonitens</i> Cockerell, 1889 | <i>Physa acuta</i>                      | Hot springs at Wellsville, Colorado [38°29'12"N, 105°54'34"W] (type locality)                                            |
| Cocup2        | AY651184, AY651222   |            |                                           |                                         |                                                                                                                          |
| ctbbsp1       | EU038363, EU038316   | Physidae   | <i>Physa pomilia</i> Conrad, 1834         | <i>Physa pomilia</i>                    | Beaver Brook State Park, Windham County, Connecticut [41°44'01"N, 72°07'35"W]                                            |
| ctbbsp5       | EU038364, EU038317   |            |                                           |                                         |                                                                                                                          |
| Cub1          | EU038365, EU038318   | Physidae   | <i>Physa cubensis</i> Pfeiffer, 1839      | <i>Physa acuta</i>                      | Cuba (Santiago de Cuba)(type locality)                                                                                   |
| Cub2          | EU038366, EU038319   |            |                                           |                                         |                                                                                                                          |
| Cub3          | EU038367, EU038320   |            |                                           |                                         |                                                                                                                          |
| Euhadra       |                      |            |                                           | <i>Euhadra herklotsi</i> (Martens)      | See Yamazaki <i>et al.</i> , 1997                                                                                        |
| F13           | EU038368, EU038321   | Physidae   | <i>Physa acuta</i> Draparnaud, 1805       | <i>Physa acuta</i>                      | The Rieutort Wadi in Saint-Martin de Londres, 25 km north of Montpellier, France [43°47'N, 03°44'W] (near type locality) |
| F23           | AY65118, AY651223    |            |                                           |                                         |                                                                                                                          |
| Gmar1         | EU038369, EU038322   | Physidae   | <i>Physa marmorata</i> Guilding, 1828     | <i>Physa marmorata</i>                  | Guadeloupe, Etang gommier                                                                                                |
| Gmar2         | EU038370, EU038323   |            |                                           |                                         |                                                                                                                          |
| inN1          | EU038371, EU038324   | Physidae   | <i>Physa integra</i> Haldeman, 1841       | <i>Physa acuta</i>                      | New Harmony, Indiana [38°08'01"N, 87°56'11"W] (type locality)                                                            |
| inN19         | EU038372, EU038325   |            |                                           |                                         |                                                                                                                          |
| lobrg1        | AY651187, AY651225   | Physidae   | <i>Physa gyrina</i> Say, 1821             | <i>Physa gyrina</i>                     | Boyer River, north of Council Bluffs Iowa. (type locality)                                                               |
| Kyksc1        | EU038373, EU038326   | Physidae   | <i>Physa microstoma</i> Haldeman, 1840    | <i>Physa gyrina</i>                     | Silver Creek, 1.5 mi down Arbuckle Rd., Madison County, Kentucky [37°39'55"N, 84°28'15"W] (type locality)                |
| Kyksc2        | EU038374, EU038327   |            |                                           |                                         |                                                                                                                          |

Continued

## Appendix. Continued

| Specimen name | genbank no. CO1, 16S | Family      | First classified as                        | Taxon name                            | Locality                                                                                                            |
|---------------|----------------------|-------------|--------------------------------------------|---------------------------------------|---------------------------------------------------------------------------------------------------------------------|
| maamb1        | EU038375, EU038328   | Physidae    | <i>Physa vernalis</i> Taylor Jokinen, 1985 | <i>Physa vernalis</i>                 | Bristol County, Massachusetts [41°55'45"N, 71°04'31"W]                                                              |
| maamb2        | EU038376, EU038329   |             |                                            |                                       |                                                                                                                     |
| mil4mpc1      | AY651206, AY651244   | Lymnaeidae  |                                            | <i>Pseudosuccinea columella</i> (Say) | Four Mile Lake, Michigan                                                                                            |
| miall1        | EU038377, EU038330   | Physidae    | <i>Physa elongata</i> Say, 1821            | <i>Aplexa elongata</i>                | Oakland County, Michigan [42°33'N, 83°31'35"W]                                                                      |
| miclm3        | EU038378, EU038331   | Physidae    | <i>Physa magnalacustris</i> Walker, 1901   | <i>Physa 'ancillaria'</i>             | Crystal Lake, Benzie County, Michigan                                                                               |
| miclm4        | EU038379, EU038332   |             |                                            |                                       | (near type locality)                                                                                                |
| midlp1        | EU038380, EU038333   | Physidae    | <i>Physa parkeri</i> Currier, 1868         | <i>Physa 'ancillaria'</i>             | North Fish Tail Bay, Douglas Lake, Cheboygan County, Michigan [45°33'47"N, 84°40'35"W]                              |
| midlp2        | EU038381, EU038334   |             |                                            |                                       |                                                                                                                     |
| midlp3        | EU038382, EU038335   |             |                                            |                                       |                                                                                                                     |
| mifkp1        | EU038383, EU038336   | Physidae    | <i>Physa magnalacustris</i> Walker, 1901   | <i>Physa 'ancillaria'</i>             | Lake Michigan at Frankfort, Benzie County, Michigan [44°38'01"N, 86°14'04"W] (type locality)                        |
| mifkp2        | EU038384, EU038337   |             |                                            |                                       |                                                                                                                     |
| mihgp1        | EU038385, EU038338   | Physidae    | <i>Physa parkeri</i> Currier, 1868         | <i>Physa 'ancillaria'</i>             | Higgins Lake, Roscommon County, Michigan. (near type locality)                                                      |
| milos1        | EU038386, EU038339   | Physidae    | <i>Physa parkeri</i> Currier, 1868         | <i>Physa 'ancillaria'</i>             | Long Lake, Michigan                                                                                                 |
| miptg1        | EU038387, EU038340   | Physidae    | <i>Physa magnalacustris</i> Walker, 1901   | <i>Physa 'ancillaria'</i>             | Lake Michigan at Petosky, Michigan.                                                                                 |
| miptg2        | EU038388, EU038341   |             |                                            |                                       | Emmet County [45°22'55"N, 84°57'41"W]                                                                               |
| nblr4         |                      | Physidae    | <i>Physa integra</i> Haldeman, 1841        | <i>Physa acuta</i>                    | Loup River, Nebraska                                                                                                |
| NNa2          | EU038389, EU038342   | Physidae    | <i>Physa acuta</i> Draparnaud, 1805        | <i>Physa acuta</i>                    | Netherlands                                                                                                         |
| NNf1          | AY651189, AY651227   | Physidae    | <i>Bulla fontinalis</i> Linnaeus, 1758     | <i>Physa fontinalis</i>               | Netherlands                                                                                                         |
| NNf2          | AY651190, AY651228   |             |                                            |                                       |                                                                                                                     |
| NZla2         | EU038390, EU038343   | Planorbidae |                                            | <i>Glyptophysa</i> sp.                | Lake Alexandria, New Zealand                                                                                        |
| padwr1        | EU038391, EU038344   | Physidae    | <i>Physa ancillaria</i> Say, 1825          | <i>Physa 'ancillaria'</i>             | Delaware River near Easton, Pennsylvania                                                                            |
| padwr3        | EU038392, EU038345   |             |                                            |                                       | [40°41'23"N, 75°12'18"W] (type locality)                                                                            |
| paP9          | AY651193, AY651231   | Physidae    | <i>Physa heterostropha</i> Say, 1817       | <i>Physa acuta</i>                    | Schuykill River, tributary of Delaware River at Philadelphia, Pennsylvania [39°58'50"N, 75°12'14"W] (type locality) |
| paP10         | AY651192, AY651230   |             |                                            |                                       |                                                                                                                     |



|            |                    |             |                                                      |                                          |                                                                                                                     |
|------------|--------------------|-------------|------------------------------------------------------|------------------------------------------|---------------------------------------------------------------------------------------------------------------------|
| scAB1      | EU038393, EU038346 | Ancyliidae  |                                                      | <i>Laevapex fuscus</i> (Adams)           | Pond at Golf Course off Bee's Ferry Road, Charleston County, SC [32°49'59"N, 80°04'13"W]                            |
| Scbct1     | AY651207, AY651245 | Planorbidae |                                                      | <i>Biomphalaria obstructa</i>            | Charles Towne Landing, Charleston County, SC [32°48'17"N, 79°59'12"W]                                               |
| Scbct2     | AY651207, AY651245 |             |                                                      |                                          |                                                                                                                     |
| Scgtvs3    | EU038394, EU038347 | Planorbidae |                                                      | <i>Gyraulus parvus</i> (Say)             | TV Station, Charleston County, SC [32°47'51"N, 79°53'45"W]                                                          |
| scjni1     | EU038395, EU038348 | Physidae    | <i>Physa</i> sp., new species                        | <i>Physa</i> species A                   | Agricultural ditch on Jenkin's Farm, John's Island, SC [32°40'N, 80°03'W]                                           |
| scjni2     | EU038396, EU038349 |             |                                                      |                                          |                                                                                                                     |
| scpb2      | AY651208, AY651246 | Planorbidae |                                                      | <i>Planorbilla trivolvis</i> (Say, 1817) | Pond at Golf Course off Bee's Ferry Road, Charleston County, SC [32°49'59"N, 80°04'13"W]                            |
| scpc3      | EU038397, EU038350 | Planorbidae |                                                      | <i>Planorbella trivolvis</i> (Say)       | Pond near Charles Towne Landing, Charleston County, SC [32°48'25"N, 79°59'24"W]                                     |
| scysr1     | AY651194, AY651232 | Physidae    | <i>Physa hendersoni</i> Clench (1925)                | <i>Physa hendersoni</i>                  | Yemassee, Hampton County, South Carolina [32°42'24"N, 87°24'07"W] (type locality)                                   |
| scysr2     | AY651195, AY651233 |             |                                                      |                                          |                                                                                                                     |
| scysr3     | AY651196, AY651234 |             |                                                      |                                          |                                                                                                                     |
| Siphonaria |                    |             |                                                      | <i>Siphonaria</i> sp.                    |                                                                                                                     |
| utf12      | EU038398, EU038351 | Physidae    | <i>Aplexa microstriata</i> Chamberlain & Berry, 1930 | <i>Physa gyrina</i>                      | Fish Lake, Sevier County, Utah. (type locality)                                                                     |
| utznp2     | AY651198, AY651236 | Physidae    | <i>Physa zionis</i> Pilsbry, 1926                    | <i>Physa zionis</i>                      | Zion National Park, The Narrows on canyon wall, Utah [37°09'54"N, 113°00'40"W] (type locality)                      |
| vahsv1     | AY651201, AY651239 | Physidae    | <i>Physa aurea</i> Lea, 1838                         | <i>Physa gyrina</i>                      | Hot Springs, Bath County, Virginia [37°59'58"N, 79°49'55"W] (type locality)                                         |
| vahsv2     | AY651202, AY651240 |             |                                                      |                                          |                                                                                                                     |
| wyspe1     | AY651204, AY651242 | Physidae    | <i>Physa spelunca</i> Turner & Clench, 1974          | <i>Physa spelunca</i>                    | Lower Kane Cave, near Kane, about 12 miles east of Lovell, on east side of Big Horn River, Wyoming. (type locality) |
| wyspe2     | AY651205, AY651243 |             |                                                      |                                          |                                                                                                                     |
